# Supplementary material for: A nanobody toolbox to investigate localisation and dynamics of Drosophila titins and other key sarcomeric proteins
Source: eLife. 2023 Jan 16;12:e79343. doi: 10.7554/eLife.79343 (PMC9886281; doi:10.7554/eLife.79343)
Supplement: Figure 6—source data 1. [file elife-79343-fig6-data1.xlsx]

## Sheet: Figure 6
file	mline_label	z_disk_label	decay_mline_label	decay_zdisk_label
Obs_GFP_Phall_Rhod_Kettin_488_1.czi_intensities.txt	Obscurin-GFP	anti_kettin	11.29772802492529	2.41355936602936
Obs_GFP_Phall_Rhod_Kettin_488_2.czi_intensities.txt	Obscurin-GFP	anti_kettin	7.185477803521085	3.1266319005404433
Obs_GFP_Phall_Rhod_Kettin_488_3.czi_intensities.txt	Obscurin-GFP	anti_kettin	5.141451969303806	4.561162733906356
Obs_GFP_Phall_Rhod_Nano2_488_1.czi_intensities.txt	Obscurin-GFP	Nano2	6.400484541472541	9.446103234415737
Obs_GFP_Phall_Rhod_Nano2_488_2.czi_intensities.txt	Obscurin-GFP	Nano2	6.86666047937528	10.724343020114139
Obs_GFP_Phall_Rhod_Kettin_488_4.czi_intensities.txt	Obscurin-GFP	anti_kettin	4.857644385203376	4.002547518510976
Obs_GFP_Phall_Rhod_Kettin_488_5.czi_intensities.txt	Obscurin-GFP	anti_kettin	11.886136371365442	4.180204385832077
Obs_GFP_Phall_Rhod_Kettin_488_6.czi_intensities.txt	Obscurin-GFP	anti_kettin	8.44221874321895	4.618434446465819
Obs_GFP_Phall_Rhod_Kettin_488_9.czi_intensities.txt	Obscurin-GFP	anti_kettin	6.791324402616685	3.0182778469884446
Obs_GFP_Phall_Rhod_Nano2_488_3.czi_intensities.txt	Obscurin-GFP	Nano2	6.8155930291296585	10.415209014813446
Obs_GFP_Phall_Rhod_Nano2_488_4.czi_intensities.txt	Obscurin-GFP	Nano2	6.631510256003252	7.673835433878097
Obs_GFP_Phall_Rhod_Nano2_488_6.czi_intensities.txt	Obscurin-GFP	Nano2	7.445490335253676	12.33389046714418
Obs_GFP_Phall_Rhod_Nano2_488_5.czi_intensities.txt	Obscurin-GFP	Nano2	5.238844206746393	8.783839655624913
Obs_GFP_Phall_Rhod_Nano2_488_8.czi_intensities.txt	Obscurin-GFP	Nano2	6.153444701072859	12.532872634533232
Obs_GFP_Phall_Rhod_Nano2_488_7.czi_intensities.txt	Obscurin-GFP	Nano2	6.132620513553671	12.313028663701962
Obs_GFP_Phall_Rhod_Nano2_488_9.czi_intensities.txt	Obscurin-GFP	Nano2	4.408570935684996	9.996005302527806

## Sheet: Figure 6_S1
file	myofibril	z_position	mean_intensity_m_line	mean_intensity_z_disk
Obs_GFP_Phall_Rhod_Kettin_488_1.czi_intensities.txt	1	0.0	0.9866901488641985	4.939640865986286
Obs_GFP_Phall_Rhod_Kettin_488_1.czi_intensities.txt	2	0.0	0.973875835630104	5.4761554422434155
Obs_GFP_Phall_Rhod_Kettin_488_1.czi_intensities.txt	3	0.0	1.0492193670614969	5.390427496292639
Obs_GFP_Phall_Rhod_Kettin_488_1.czi_intensities.txt	4	0.0	1.0137656813412077	6.086342335216879
Obs_GFP_Phall_Rhod_Kettin_488_1.czi_intensities.txt	5	0.0	1.1258956549751833	6.481829877285243
Obs_GFP_Phall_Rhod_Kettin_488_1.czi_intensities.txt	6	1.0	1.0685529032198733	3.9014312576278884
Obs_GFP_Phall_Rhod_Kettin_488_1.czi_intensities.txt	7	1.0	0.9303418442844881	4.4831093172595855
Obs_GFP_Phall_Rhod_Kettin_488_1.czi_intensities.txt	8	1.0	0.9655348195743341	4.655132280234866
Obs_GFP_Phall_Rhod_Kettin_488_1.czi_intensities.txt	9	1.0	0.9405852263580214	5.05070026259088
Obs_GFP_Phall_Rhod_Kettin_488_1.czi_intensities.txt	10	1.0	0.9283119212517337	4.753898666277169
Obs_GFP_Phall_Rhod_Kettin_488_1.czi_intensities.txt	11	1.0	0.945628609322528	5.3509114922069205
Obs_GFP_Phall_Rhod_Kettin_488_1.czi_intensities.txt	12	1.0	0.9326857832405516	5.50700392415012
Obs_GFP_Phall_Rhod_Kettin_488_1.czi_intensities.txt	13	1.0	0.9919876378870978	5.249971003807143
Obs_GFP_Phall_Rhod_Kettin_488_1.czi_intensities.txt	14	2.0	0.839829734103689	3.1754288365751293
Obs_GFP_Phall_Rhod_Kettin_488_1.czi_intensities.txt	15	2.0	0.7332042831198903	3.2905503388575967
Obs_GFP_Phall_Rhod_Kettin_488_1.czi_intensities.txt	16	2.0	0.8297826489855713	3.8325307013135856
Obs_GFP_Phall_Rhod_Kettin_488_1.czi_intensities.txt	17	2.0	0.8095177508865569	4.136251267107835
Obs_GFP_Phall_Rhod_Kettin_488_1.czi_intensities.txt	18	2.0	0.7574330687255368	4.313013460518112
Obs_GFP_Phall_Rhod_Kettin_488_1.czi_intensities.txt	19	2.0	0.9001176422440311	4.294625896597733
Obs_GFP_Phall_Rhod_Kettin_488_1.czi_intensities.txt	20	2.0	0.9252305786915977	4.786730334909246
Obs_GFP_Phall_Rhod_Kettin_488_1.czi_intensities.txt	21	2.0	0.8937956819186885	4.612444510569343
Obs_GFP_Phall_Rhod_Kettin_488_1.czi_intensities.txt	22	3.0	0.8604295663392292	2.8085701067371853
Obs_GFP_Phall_Rhod_Kettin_488_1.czi_intensities.txt	23	3.0	0.7921085562553394	3.081343191280394
Obs_GFP_Phall_Rhod_Kettin_488_1.czi_intensities.txt	24	3.0	0.8164863288842569	3.749745806140937
Obs_GFP_Phall_Rhod_Kettin_488_1.czi_intensities.txt	25	3.0	0.7960714158381239	4.149125528108743
Obs_GFP_Phall_Rhod_Kettin_488_1.czi_intensities.txt	26	4.0	0.7945230527845085	2.2236367443985854
Obs_GFP_Phall_Rhod_Kettin_488_1.czi_intensities.txt	27	4.0	0.6948846421042014	2.5928568025389556
Obs_GFP_Phall_Rhod_Kettin_488_1.czi_intensities.txt	28	4.0	0.7984831272324696	2.5973526178901363
Obs_GFP_Phall_Rhod_Kettin_488_1.czi_intensities.txt	29	4.0	0.8221141046300856	2.3127858319020738
Obs_GFP_Phall_Rhod_Kettin_488_1.czi_intensities.txt	30	4.0	0.760029852956674	2.701800905162795
Obs_GFP_Phall_Rhod_Kettin_488_1.czi_intensities.txt	31	4.0	0.7950715894478179	2.829612576741302
Obs_GFP_Phall_Rhod_Kettin_488_1.czi_intensities.txt	32	4.0	0.8147679303821064	2.8758360931048648
Obs_GFP_Phall_Rhod_Kettin_488_1.czi_intensities.txt	33	5.0	0.7724605429305339	1.6671680439560503
Obs_GFP_Phall_Rhod_Kettin_488_1.czi_intensities.txt	34	5.0	0.7566554711413304	1.9094723600535393
Obs_GFP_Phall_Rhod_Kettin_488_1.czi_intensities.txt	35	5.0	0.7988341522915707	1.9336274739223513
Obs_GFP_Phall_Rhod_Kettin_488_1.czi_intensities.txt	36	5.0	0.7766828162508337	1.815474904083284
Obs_GFP_Phall_Rhod_Kettin_488_1.czi_intensities.txt	37	5.0	0.6741397921606495	1.9516728368765048
Obs_GFP_Phall_Rhod_Kettin_488_1.czi_intensities.txt	38	5.0	0.7865699640454787	2.2071217255807034
Obs_GFP_Phall_Rhod_Kettin_488_1.czi_intensities.txt	39	6.0	0.7380277789638339	2.001293673181491
Obs_GFP_Phall_Rhod_Kettin_488_1.czi_intensities.txt	40	6.0	0.654977789385091	1.4326148246747727
Obs_GFP_Phall_Rhod_Kettin_488_1.czi_intensities.txt	41	6.0	0.6345257444415194	1.358639632218157
Obs_GFP_Phall_Rhod_Kettin_488_1.czi_intensities.txt	42	6.0	0.7576305459585644	1.8543330939935847
Obs_GFP_Phall_Rhod_Kettin_488_1.czi_intensities.txt	43	6.0	0.7296534687874515	2.197999855594183
Obs_GFP_Phall_Rhod_Kettin_488_1.czi_intensities.txt	44	7.0	0.719438345990568	0.8141783641208462
Obs_GFP_Phall_Rhod_Kettin_488_1.czi_intensities.txt	45	7.0	0.6994196125181987	1.0864060214962246
Obs_GFP_Phall_Rhod_Kettin_488_1.czi_intensities.txt	46	7.0	0.6544429060340825	1.5520801503759423
Obs_GFP_Phall_Rhod_Kettin_488_1.czi_intensities.txt	47	7.0	0.6075238786062587	1.7084510973774745
Obs_GFP_Phall_Rhod_Kettin_488_1.czi_intensities.txt	48	7.0	0.8023097585967581	1.457432335859139
Obs_GFP_Phall_Rhod_Kettin_488_1.czi_intensities.txt	49	8.0	0.7272632427436589	0.7142253565136947
Obs_GFP_Phall_Rhod_Kettin_488_1.czi_intensities.txt	50	8.0	0.7257924311182099	0.7313947539609679
Obs_GFP_Phall_Rhod_Kettin_488_1.czi_intensities.txt	51	8.0	0.6895815182101567	1.0377224331521009
Obs_GFP_Phall_Rhod_Kettin_488_1.czi_intensities.txt	52	8.0	0.6687921901841676	1.0032828190095746
Obs_GFP_Phall_Rhod_Kettin_488_1.czi_intensities.txt	53	8.0	0.6480321058495971	1.1165756081806506
Obs_GFP_Phall_Rhod_Kettin_488_1.czi_intensities.txt	54	9.0	0.598645990194847	0.6548449510887979
Obs_GFP_Phall_Rhod_Kettin_488_1.czi_intensities.txt	55	9.0	0.5934911795232612	0.9039627230005005
Obs_GFP_Phall_Rhod_Kettin_488_1.czi_intensities.txt	56	9.0	0.63483459147588	0.9094527504685382
Obs_GFP_Phall_Rhod_Kettin_488_1.czi_intensities.txt	57	9.0	0.6294804883255526	0.6426302754474867
Obs_GFP_Phall_Rhod_Kettin_488_1.czi_intensities.txt	58	9.0	0.6571623931165448	1.0073624086218074
Obs_GFP_Phall_Rhod_Kettin_488_1.czi_intensities.txt	59	9.0	0.6671130343115055	1.0881643342384428
Obs_GFP_Phall_Rhod_Kettin_488_1.czi_intensities.txt	60	10.0	0.623719956559	0.5262832773364728
Obs_GFP_Phall_Rhod_Kettin_488_1.czi_intensities.txt	61	10.0	0.5974035743613262	0.624062819665831
Obs_GFP_Phall_Rhod_Kettin_488_1.czi_intensities.txt	62	10.0	0.6026405568409144	0.9166596751594853
Obs_GFP_Phall_Rhod_Kettin_488_1.czi_intensities.txt	63	10.0	0.6388462488320013	0.9866840372245044
Obs_GFP_Phall_Rhod_Kettin_488_1.czi_intensities.txt	64	11.0	0.6196707779372781	0.5950893721578647
Obs_GFP_Phall_Rhod_Kettin_488_1.czi_intensities.txt	65	11.0	0.5198611839532998	0.8366377641638806
Obs_GFP_Phall_Rhod_Kettin_488_1.czi_intensities.txt	66	11.0	0.5450803368863222	0.40201650971892117
Obs_GFP_Phall_Rhod_Kettin_488_1.czi_intensities.txt	67	12.0	0.5262315325517282	0.44984161702594067
Obs_GFP_Phall_Rhod_Kettin_488_1.czi_intensities.txt	68	12.0	0.5329545948657034	0.5012422128222407
Obs_GFP_Phall_Rhod_Kettin_488_1.czi_intensities.txt	69	12.0	0.5592719950053665	0.5750306392578939
Obs_GFP_Phall_Rhod_Kettin_488_1.czi_intensities.txt	70	12.0	0.5367118230399973	0.3477453129803307
Obs_GFP_Phall_Rhod_Kettin_488_1.czi_intensities.txt	71	12.0	0.472095251231093	0.4431491962153134
Obs_GFP_Phall_Rhod_Kettin_488_1.czi_intensities.txt	72	12.0	0.5691100607034779	0.507009919638385
Obs_GFP_Phall_Rhod_Kettin_488_1.czi_intensities.txt	73	13.0	0.5296922414784758	0.2619290614091529
Obs_GFP_Phall_Rhod_Kettin_488_1.czi_intensities.txt	74	13.0	0.5087741734222241	0.3002333963065184
Obs_GFP_Phall_Rhod_Kettin_488_1.czi_intensities.txt	75	13.0	0.5438411939054926	0.24246693233319183
Obs_GFP_Phall_Rhod_Kettin_488_1.czi_intensities.txt	76	13.0	0.5188524196179449	0.38218438989812087
Obs_GFP_Phall_Rhod_Kettin_488_1.czi_intensities.txt	77	13.0	0.5628273553847303	0.46054290958986666
Obs_GFP_Phall_Rhod_Kettin_488_1.czi_intensities.txt	78	14.0	0.4875600322526338	0.2336058309409954
Obs_GFP_Phall_Rhod_Kettin_488_1.czi_intensities.txt	79	14.0	0.5292021457009052	0.352501984243121
Obs_GFP_Phall_Rhod_Kettin_488_1.czi_intensities.txt	80	14.0	0.4821097739640765	0.2256555157420329
Obs_GFP_Phall_Rhod_Kettin_488_1.czi_intensities.txt	81	14.0	0.48228926099693786	0.29533775853304695
Obs_GFP_Phall_Rhod_Kettin_488_1.czi_intensities.txt	82	14.0	0.5191435154948273	0.39380580404258414
Obs_GFP_Phall_Rhod_Kettin_488_1.czi_intensities.txt	83	15.0	0.4857373832021777	0.21886844933326668
Obs_GFP_Phall_Rhod_Kettin_488_1.czi_intensities.txt	84	15.0	0.5323244822844465	0.28976220589224966
Obs_GFP_Phall_Rhod_Kettin_488_1.czi_intensities.txt	85	15.0	0.4652733987566032	0.1609094067493157
Obs_GFP_Phall_Rhod_Kettin_488_1.czi_intensities.txt	86	15.0	0.4775996989434616	0.27006684872427705
Obs_GFP_Phall_Rhod_Kettin_488_1.czi_intensities.txt	87	15.0	0.6113464644840093	0.2829533583461532
Obs_GFP_Phall_Rhod_Kettin_488_1.czi_intensities.txt	88	16.0	0.4743169756762257	0.15736090753278367
Obs_GFP_Phall_Rhod_Kettin_488_1.czi_intensities.txt	89	16.0	0.4830571907081892	0.23399895758223763
Obs_GFP_Phall_Rhod_Kettin_488_1.czi_intensities.txt	90	16.0	0.4344931599840034	0.20148061951985763
Obs_GFP_Phall_Rhod_Kettin_488_1.czi_intensities.txt	91	16.0	0.5519133978530839	0.2784540467511164
Obs_GFP_Phall_Rhod_Kettin_488_1.czi_intensities.txt	92	16.0	0.5686774283745192	0.29351933846565575
Obs_GFP_Phall_Rhod_Kettin_488_1.czi_intensities.txt	93	17.0	0.4707759619836006	0.2604358001208019
Obs_GFP_Phall_Rhod_Kettin_488_1.czi_intensities.txt	94	17.0	0.4718474824974076	0.18869309690908181
Obs_GFP_Phall_Rhod_Kettin_488_1.czi_intensities.txt	95	17.0	0.4131271301314968	0.2241702884018913
Obs_GFP_Phall_Rhod_Kettin_488_1.czi_intensities.txt	96	17.0	0.5198783465768525	0.24173273358832403
Obs_GFP_Phall_Rhod_Kettin_488_1.czi_intensities.txt	97	18.0	0.45345683676442106	0.16974745089829454
Obs_GFP_Phall_Rhod_Kettin_488_1.czi_intensities.txt	98	18.0	0.4443389150782676	0.2000841090468725
Obs_GFP_Phall_Rhod_Kettin_488_2.czi_intensities.txt	1	0.0	1.3440263094914333	2.16762127339978
Obs_GFP_Phall_Rhod_Kettin_488_2.czi_intensities.txt	2	0.0	1.3259263669233823	1.7381183633586046
Obs_GFP_Phall_Rhod_Kettin_488_2.czi_intensities.txt	3	0.0	1.3581469132034252	2.033241898088448
Obs_GFP_Phall_Rhod_Kettin_488_2.czi_intensities.txt	4	0.0	1.2829521367743717	1.5026893470346
Obs_GFP_Phall_Rhod_Kettin_488_2.czi_intensities.txt	5	0.0	1.2603557309941618	2.0948604244415248
Obs_GFP_Phall_Rhod_Kettin_488_2.czi_intensities.txt	6	0.0	1.2386578693596009	2.371395407995588
Obs_GFP_Phall_Rhod_Kettin_488_2.czi_intensities.txt	7	0.0	1.1008448177950578	2.979945371232274
Obs_GFP_Phall_Rhod_Kettin_488_2.czi_intensities.txt	8	1.0	1.1056456642680497	1.6187390032459474
Obs_GFP_Phall_Rhod_Kettin_488_2.czi_intensities.txt	9	1.0	1.1901259221864076	1.3866581633151467
Obs_GFP_Phall_Rhod_Kettin_488_2.czi_intensities.txt	10	1.0	1.040184532301122	1.5174870301240695
Obs_GFP_Phall_Rhod_Kettin_488_2.czi_intensities.txt	11	1.0	1.028421041598122	1.1175913186237207
Obs_GFP_Phall_Rhod_Kettin_488_2.czi_intensities.txt	12	1.0	1.0842556708248186	1.5622229640318177
Obs_GFP_Phall_Rhod_Kettin_488_2.czi_intensities.txt	13	1.0	0.9817042552970341	1.544062553451379
Obs_GFP_Phall_Rhod_Kettin_488_2.czi_intensities.txt	14	1.0	0.9458574425154425	1.9964373330250464
Obs_GFP_Phall_Rhod_Kettin_488_2.czi_intensities.txt	15	1.0	0.991235996150672	1.9943044425218197
Obs_GFP_Phall_Rhod_Kettin_488_2.czi_intensities.txt	16	2.0	0.9657070270421841	1.7931674738328518
Obs_GFP_Phall_Rhod_Kettin_488_2.czi_intensities.txt	17	2.0	0.9951620136919761	1.2310097250928256
Obs_GFP_Phall_Rhod_Kettin_488_2.czi_intensities.txt	18	2.0	0.8960626438570893	1.0244480705266363
Obs_GFP_Phall_Rhod_Kettin_488_2.czi_intensities.txt	19	2.0	0.8577807447329299	1.4032675032735196
Obs_GFP_Phall_Rhod_Kettin_488_2.czi_intensities.txt	20	2.0	0.8161399248466994	1.6357902510392808
Obs_GFP_Phall_Rhod_Kettin_488_2.czi_intensities.txt	21	2.0	0.9222148404727534	2.154129815014137
Obs_GFP_Phall_Rhod_Kettin_488_2.czi_intensities.txt	22	2.0	0.7977887920776033	1.6310238003987334
Obs_GFP_Phall_Rhod_Kettin_488_2.czi_intensities.txt	23	3.0	0.9248761170990851	1.4303451618018572
Obs_GFP_Phall_Rhod_Kettin_488_2.czi_intensities.txt	24	3.0	0.8708200730774294	1.011690163322433
Obs_GFP_Phall_Rhod_Kettin_488_2.czi_intensities.txt	25	3.0	0.6574750685165398	1.0029640920796234
Obs_GFP_Phall_Rhod_Kettin_488_2.czi_intensities.txt	26	3.0	0.8109383720289511	1.7072140644294336
Obs_GFP_Phall_Rhod_Kettin_488_2.czi_intensities.txt	27	4.0	0.9034815237786585	0.8466541354267094
Obs_GFP_Phall_Rhod_Kettin_488_2.czi_intensities.txt	28	4.0	0.8099602319928542	1.11009556898531
Obs_GFP_Phall_Rhod_Kettin_488_2.czi_intensities.txt	29	4.0	0.8593415690845598	0.834015310662291
Obs_GFP_Phall_Rhod_Kettin_488_2.czi_intensities.txt	30	4.0	0.8324281877098644	1.214757956625327
Obs_GFP_Phall_Rhod_Kettin_488_2.czi_intensities.txt	31	4.0	0.793485934307176	1.5731369244809055
Obs_GFP_Phall_Rhod_Kettin_488_2.czi_intensities.txt	32	5.0	0.7883164756819004	0.8235964996425521
Obs_GFP_Phall_Rhod_Kettin_488_2.czi_intensities.txt	33	5.0	0.7720415311057857	0.6183958321178812
Obs_GFP_Phall_Rhod_Kettin_488_2.czi_intensities.txt	34	5.0	0.7784867992210195	0.7557979021652452
Obs_GFP_Phall_Rhod_Kettin_488_2.czi_intensities.txt	35	5.0	0.7708538484857187	0.8375892976353254
Obs_GFP_Phall_Rhod_Kettin_488_2.czi_intensities.txt	36	5.0	0.7380043303891078	1.0560125660198074
Obs_GFP_Phall_Rhod_Kettin_488_2.czi_intensities.txt	37	6.0	0.7173937419582638	0.7396882644749262
Obs_GFP_Phall_Rhod_Kettin_488_2.czi_intensities.txt	38	6.0	0.7025961187551243	0.6331545238220738
Obs_GFP_Phall_Rhod_Kettin_488_2.czi_intensities.txt	39	6.0	0.7770214676417765	0.7013585715090791
Obs_GFP_Phall_Rhod_Kettin_488_2.czi_intensities.txt	40	6.0	0.7075301234451931	0.9517483024985854
Obs_GFP_Phall_Rhod_Kettin_488_2.czi_intensities.txt	41	7.0	0.7414927068097873	0.6216457019176674
Obs_GFP_Phall_Rhod_Kettin_488_2.czi_intensities.txt	42	7.0	0.6715714113442554	0.549171626633301
Obs_GFP_Phall_Rhod_Kettin_488_2.czi_intensities.txt	43	7.0	0.7023065800651365	0.6137613445123058
Obs_GFP_Phall_Rhod_Kettin_488_2.czi_intensities.txt	44	7.0	0.6402566411628486	0.8180749968395719
Obs_GFP_Phall_Rhod_Kettin_488_2.czi_intensities.txt	45	7.0	0.6303110129983482	0.8578197108383823
Obs_GFP_Phall_Rhod_Kettin_488_2.czi_intensities.txt	46	8.0	0.6019613150299401	0.5038996982719502
Obs_GFP_Phall_Rhod_Kettin_488_2.czi_intensities.txt	47	8.0	0.6473393561960532	0.5047215574626165
Obs_GFP_Phall_Rhod_Kettin_488_2.czi_intensities.txt	48	8.0	0.6720015179650902	0.4695719370945038
Obs_GFP_Phall_Rhod_Kettin_488_2.czi_intensities.txt	49	8.0	0.6250868859649282	0.48953051868921504
Obs_GFP_Phall_Rhod_Kettin_488_2.czi_intensities.txt	50	8.0	0.6507965055628754	0.6100407762588048
Obs_GFP_Phall_Rhod_Kettin_488_2.czi_intensities.txt	51	9.0	0.6727720488781622	0.4182490501358585
Obs_GFP_Phall_Rhod_Kettin_488_2.czi_intensities.txt	52	9.0	0.6495068936785673	0.471149935297976
Obs_GFP_Phall_Rhod_Kettin_488_2.czi_intensities.txt	53	9.0	0.643508909530467	0.41987410681896964
Obs_GFP_Phall_Rhod_Kettin_488_2.czi_intensities.txt	54	9.0	0.637302985623518	0.7251418622804111
Obs_GFP_Phall_Rhod_Kettin_488_2.czi_intensities.txt	55	10.0	0.6307901913279039	0.36255264234272444
Obs_GFP_Phall_Rhod_Kettin_488_2.czi_intensities.txt	56	10.0	0.565857234144135	0.3465019944689332
Obs_GFP_Phall_Rhod_Kettin_488_2.czi_intensities.txt	57	10.0	0.5472965826719695	0.49071082904768015
Obs_GFP_Phall_Rhod_Kettin_488_2.czi_intensities.txt	58	10.0	0.5582209348714622	0.40989304111706154
Obs_GFP_Phall_Rhod_Kettin_488_2.czi_intensities.txt	59	10.0	0.5858166494490193	0.48688736747789507
Obs_GFP_Phall_Rhod_Kettin_488_2.czi_intensities.txt	60	11.0	0.5581858705319562	0.3459680996539208
Obs_GFP_Phall_Rhod_Kettin_488_2.czi_intensities.txt	61	11.0	0.5262685583472007	0.3239908814955143
Obs_GFP_Phall_Rhod_Kettin_488_2.czi_intensities.txt	62	11.0	0.5513689867878161	0.4418137832506972
Obs_GFP_Phall_Rhod_Kettin_488_2.czi_intensities.txt	63	11.0	0.5217359844429572	0.4076039534380978
Obs_GFP_Phall_Rhod_Kettin_488_2.czi_intensities.txt	64	12.0	0.5291042217624662	0.30063714224841276
Obs_GFP_Phall_Rhod_Kettin_488_2.czi_intensities.txt	65	12.0	0.5592860055094175	0.26127120663910053
Obs_GFP_Phall_Rhod_Kettin_488_2.czi_intensities.txt	66	12.0	0.5411420457817882	0.29715528949042885
Obs_GFP_Phall_Rhod_Kettin_488_2.czi_intensities.txt	67	13.0	0.5143052175549906	0.27394699091201596
Obs_GFP_Phall_Rhod_Kettin_488_2.czi_intensities.txt	68	13.0	0.5225981095683679	0.3037376249988256
Obs_GFP_Phall_Rhod_Kettin_488_2.czi_intensities.txt	69	13.0	0.5485061238206682	0.33778913742426625
Obs_GFP_Phall_Rhod_Kettin_488_3.czi_intensities.txt	1	1.0	2.2849244342904775	3.1305379415183894
Obs_GFP_Phall_Rhod_Kettin_488_3.czi_intensities.txt	2	1.0	2.513798806611032	3.147160507890618
Obs_GFP_Phall_Rhod_Kettin_488_3.czi_intensities.txt	3	1.0	2.4112195911854393	3.0195756822486706
Obs_GFP_Phall_Rhod_Kettin_488_3.czi_intensities.txt	4	1.0	2.5279921159422343	2.628708646312333
Obs_GFP_Phall_Rhod_Kettin_488_3.czi_intensities.txt	5	1.0	2.2422645206885976	2.609451141069161
Obs_GFP_Phall_Rhod_Kettin_488_3.czi_intensities.txt	6	1.0	2.3888831425250907	2.5798243105190735
Obs_GFP_Phall_Rhod_Kettin_488_3.czi_intensities.txt	7	1.0	2.3965689897036127	2.3932533818490174
Obs_GFP_Phall_Rhod_Kettin_488_3.czi_intensities.txt	8	1.0	2.373265791984097	2.77451812841854
Obs_GFP_Phall_Rhod_Kettin_488_3.czi_intensities.txt	9	1.0	2.487322152704121	2.7257263936956018
Obs_GFP_Phall_Rhod_Kettin_488_3.czi_intensities.txt	10	2.0	2.0101114748720548	3.226852568029495
Obs_GFP_Phall_Rhod_Kettin_488_3.czi_intensities.txt	11	2.0	1.7728894871756873	3.0231278348784385
Obs_GFP_Phall_Rhod_Kettin_488_3.czi_intensities.txt	12	2.0	1.9929284029740173	3.3992970291653952
Obs_GFP_Phall_Rhod_Kettin_488_3.czi_intensities.txt	13	2.0	1.9712351163599493	2.695084915606545
Obs_GFP_Phall_Rhod_Kettin_488_3.czi_intensities.txt	14	2.0	1.785053225349795	2.56087801739728
Obs_GFP_Phall_Rhod_Kettin_488_3.czi_intensities.txt	15	2.0	2.006212576496835	2.2572482323988714
Obs_GFP_Phall_Rhod_Kettin_488_3.czi_intensities.txt	16	2.0	2.196824337032365	2.4999409941190676
Obs_GFP_Phall_Rhod_Kettin_488_3.czi_intensities.txt	17	2.0	2.1562944934737804	2.404691182767139
Obs_GFP_Phall_Rhod_Kettin_488_3.czi_intensities.txt	18	2.0	2.1789173607734287	2.4509227213443907
Obs_GFP_Phall_Rhod_Kettin_488_3.czi_intensities.txt	19	3.0	1.7551105064543382	2.863926896701138
Obs_GFP_Phall_Rhod_Kettin_488_3.czi_intensities.txt	20	3.0	1.5455641242745093	1.4558433297650646
Obs_GFP_Phall_Rhod_Kettin_488_3.czi_intensities.txt	21	4.0	1.5317455534605837	2.463787560420397
Obs_GFP_Phall_Rhod_Kettin_488_3.czi_intensities.txt	22	4.0	1.5575947478343017	2.374508194666159
Obs_GFP_Phall_Rhod_Kettin_488_3.czi_intensities.txt	23	4.0	1.64810798413127	1.320819670434272
Obs_GFP_Phall_Rhod_Kettin_488_3.czi_intensities.txt	24	5.0	1.218183907292	3.624138641128087
Obs_GFP_Phall_Rhod_Kettin_488_3.czi_intensities.txt	25	5.0	1.4462213393821626	2.6661892036996946
Obs_GFP_Phall_Rhod_Kettin_488_3.czi_intensities.txt	26	5.0	1.4333968843453975	1.8236977493752726
Obs_GFP_Phall_Rhod_Kettin_488_3.czi_intensities.txt	27	5.0	1.5085185513429196	1.7964428939760446
Obs_GFP_Phall_Rhod_Kettin_488_3.czi_intensities.txt	28	5.0	1.5401792301448294	1.597471971281995
Obs_GFP_Phall_Rhod_Kettin_488_3.czi_intensities.txt	29	5.0	1.5135785945575484	1.420934782598634
Obs_GFP_Phall_Rhod_Kettin_488_3.czi_intensities.txt	30	5.0	1.3344360738802628	1.6208631908999878
Obs_GFP_Phall_Rhod_Kettin_488_3.czi_intensities.txt	31	6.0	0.9785587401670954	2.858802200127374
Obs_GFP_Phall_Rhod_Kettin_488_3.czi_intensities.txt	32	6.0	1.213758980636904	2.2005687485565435
Obs_GFP_Phall_Rhod_Kettin_488_3.czi_intensities.txt	33	6.0	1.4470459127026234	1.3679290482669384
Obs_GFP_Phall_Rhod_Kettin_488_3.czi_intensities.txt	34	6.0	1.329741335012745	1.104557653744992
Obs_GFP_Phall_Rhod_Kettin_488_3.czi_intensities.txt	35	6.0	1.506464438196208	1.5767433565481037
Obs_GFP_Phall_Rhod_Kettin_488_3.czi_intensities.txt	36	7.0	0.9686699856592383	2.766803801955707
Obs_GFP_Phall_Rhod_Kettin_488_3.czi_intensities.txt	37	7.0	1.0168415799429174	2.8789103629004247
Obs_GFP_Phall_Rhod_Kettin_488_3.czi_intensities.txt	38	7.0	1.2076186871790404	1.6575890846186319
Obs_GFP_Phall_Rhod_Kettin_488_3.czi_intensities.txt	39	7.0	1.1836818998427718	1.5174162022974995
Obs_GFP_Phall_Rhod_Kettin_488_3.czi_intensities.txt	40	7.0	1.1577265160332002	1.0203237272407815
Obs_GFP_Phall_Rhod_Kettin_488_3.czi_intensities.txt	41	8.0	1.0324539292917534	1.5429061696213995
Obs_GFP_Phall_Rhod_Kettin_488_3.czi_intensities.txt	42	8.0	1.1344181535308164	0.9852903603724303
Obs_GFP_Phall_Rhod_Kettin_488_3.czi_intensities.txt	43	8.0	1.0304594956185005	0.7570989319436034
Obs_GFP_Phall_Rhod_Kettin_488_3.czi_intensities.txt	44	8.0	1.2075015829739666	0.8442392898168548
Obs_GFP_Phall_Rhod_Kettin_488_3.czi_intensities.txt	45	9.0	1.0871238487212145	1.4755613763517688
Obs_GFP_Phall_Rhod_Kettin_488_3.czi_intensities.txt	46	9.0	1.0333471128450797	0.7009828876745899
Obs_GFP_Phall_Rhod_Kettin_488_3.czi_intensities.txt	47	10.0	1.0208840802175145	1.4887820795935047
Obs_GFP_Phall_Rhod_Kettin_488_3.czi_intensities.txt	48	10.0	1.017094969881955	1.2447166728806514
Obs_GFP_Phall_Rhod_Kettin_488_3.czi_intensities.txt	49	11.0	0.70035566501503	1.2840186496732875
Obs_GFP_Phall_Rhod_Kettin_488_3.czi_intensities.txt	50	11.0	0.8518910669556004	0.9461930611319688
Obs_GFP_Phall_Rhod_Kettin_488_3.czi_intensities.txt	51	11.0	0.8881188750652552	0.7968218412273277
Obs_GFP_Phall_Rhod_Kettin_488_3.czi_intensities.txt	52	11.0	0.8215840724867141	0.5923690710072872
Obs_GFP_Phall_Rhod_Kettin_488_3.czi_intensities.txt	53	11.0	0.8946609933427383	0.6482466749852307
Obs_GFP_Phall_Rhod_Kettin_488_3.czi_intensities.txt	54	11.0	0.9397614344615345	0.48704695092823375
Obs_GFP_Phall_Rhod_Kettin_488_3.czi_intensities.txt	55	11.0	0.8551030049054337	1.2706861991190261
Obs_GFP_Phall_Rhod_Kettin_488_3.czi_intensities.txt	56	12.0	0.8059869860571248	1.2060051157621245
Obs_GFP_Phall_Rhod_Kettin_488_3.czi_intensities.txt	57	12.0	0.743972723018035	0.9144705931574119
Obs_GFP_Phall_Rhod_Kettin_488_3.czi_intensities.txt	58	12.0	0.874225872816168	1.065010977764939
Obs_GFP_Phall_Rhod_Kettin_488_3.czi_intensities.txt	59	12.0	0.6969249839570062	0.5281469400144841
Obs_GFP_Phall_Rhod_Kettin_488_3.czi_intensities.txt	60	12.0	0.8071731124098345	0.46298947416812314
Obs_GFP_Phall_Rhod_Kettin_488_3.czi_intensities.txt	61	12.0	0.7942135354405625	0.46398813606401434
Obs_GFP_Phall_Rhod_Kettin_488_3.czi_intensities.txt	62	12.0	0.8119056126913129	0.44047463992548724
Obs_GFP_Phall_Rhod_Kettin_488_3.czi_intensities.txt	63	13.0	0.7681957253223702	1.1761673140549374
Obs_GFP_Phall_Rhod_Kettin_488_3.czi_intensities.txt	64	13.0	0.7965997656688545	0.611378704613169
Obs_GFP_Phall_Rhod_Kettin_488_3.czi_intensities.txt	65	13.0	0.7826177898758849	0.4235223340917494
Obs_GFP_Phall_Rhod_Kettin_488_3.czi_intensities.txt	66	13.0	0.9090383760875547	0.9618000727102755
Obs_GFP_Phall_Rhod_Kettin_488_3.czi_intensities.txt	67	14.0	0.7403415694654376	0.9240167205455222
Obs_GFP_Phall_Rhod_Kettin_488_3.czi_intensities.txt	68	14.0	0.6954318029982984	0.5008225051071776
Obs_GFP_Phall_Rhod_Kettin_488_3.czi_intensities.txt	69	14.0	0.6658737798201254	0.5417780225051042
Obs_GFP_Phall_Rhod_Kettin_488_3.czi_intensities.txt	70	14.0	0.7128598336954327	0.5260987903131182
Obs_GFP_Phall_Rhod_Kettin_488_3.czi_intensities.txt	71	14.0	0.8387819248511129	0.9636103491788913
Obs_GFP_Phall_Rhod_Kettin_488_3.czi_intensities.txt	72	15.0	0.6848994088189728	0.41446280509812156
Obs_GFP_Phall_Rhod_Kettin_488_3.czi_intensities.txt	73	15.0	0.709006062695664	0.40315907992226985
Obs_GFP_Phall_Rhod_Kettin_488_3.czi_intensities.txt	74	15.0	0.7061041541809814	0.3479054101947984
Obs_GFP_Phall_Rhod_Kettin_488_3.czi_intensities.txt	75	15.0	0.7447761117921646	0.42584374396281066
Obs_GFP_Phall_Rhod_Nano2_488_1.czi_intensities.txt	1	0.0	0.4785579705692977	3.8620567739576264
Obs_GFP_Phall_Rhod_Nano2_488_1.czi_intensities.txt	2	0.0	0.5752682833206331	4.007618354816641
Obs_GFP_Phall_Rhod_Nano2_488_1.czi_intensities.txt	3	0.0	0.5522721488854163	4.326367196425632
Obs_GFP_Phall_Rhod_Nano2_488_1.czi_intensities.txt	4	1.0	0.45860136359200626	4.140956002715674
Obs_GFP_Phall_Rhod_Nano2_488_1.czi_intensities.txt	5	1.0	0.5272426226078643	4.007915650016029
Obs_GFP_Phall_Rhod_Nano2_488_1.czi_intensities.txt	6	1.0	0.4374108669167164	3.9691546795721315
Obs_GFP_Phall_Rhod_Nano2_488_1.czi_intensities.txt	7	1.0	0.4754971140497024	4.11212555644017
Obs_GFP_Phall_Rhod_Nano2_488_1.czi_intensities.txt	8	1.0	0.4827691084021432	4.112757046738791
Obs_GFP_Phall_Rhod_Nano2_488_1.czi_intensities.txt	9	2.0	0.39626447026791384	3.9196965419408514
Obs_GFP_Phall_Rhod_Nano2_488_1.czi_intensities.txt	10	2.0	0.39709363142174714	3.6563564785013316
Obs_GFP_Phall_Rhod_Nano2_488_1.czi_intensities.txt	11	2.0	0.3543773297021547	3.6900860414801135
Obs_GFP_Phall_Rhod_Nano2_488_1.czi_intensities.txt	12	2.0	0.3627612056632206	3.8718183567793
Obs_GFP_Phall_Rhod_Nano2_488_1.czi_intensities.txt	13	2.0	0.3556226155503493	3.4765937388442767
Obs_GFP_Phall_Rhod_Nano2_488_1.czi_intensities.txt	14	2.0	0.49211724233922893	3.857019562554515
Obs_GFP_Phall_Rhod_Nano2_488_1.czi_intensities.txt	15	3.0	0.3720258611763845	3.631540098439402
Obs_GFP_Phall_Rhod_Nano2_488_1.czi_intensities.txt	16	3.0	0.30517164540149794	3.908266600907889
Obs_GFP_Phall_Rhod_Nano2_488_1.czi_intensities.txt	17	3.0	0.3823356967953743	3.105938873351203
Obs_GFP_Phall_Rhod_Nano2_488_1.czi_intensities.txt	18	3.0	0.39562116457621566	3.628017091812197
Obs_GFP_Phall_Rhod_Nano2_488_1.czi_intensities.txt	19	4.0	0.33118287249930606	3.5027474406857118
Obs_GFP_Phall_Rhod_Nano2_488_1.czi_intensities.txt	20	4.0	0.28174926754834134	3.7389347010183895
Obs_GFP_Phall_Rhod_Nano2_488_1.czi_intensities.txt	21	4.0	0.35168354940865765	3.18937740749395
Obs_GFP_Phall_Rhod_Nano2_488_1.czi_intensities.txt	22	4.0	0.36712015104458523	3.042362558380153
Obs_GFP_Phall_Rhod_Nano2_488_1.czi_intensities.txt	23	4.0	0.32109786227026227	3.4098779035000026
Obs_GFP_Phall_Rhod_Nano2_488_1.czi_intensities.txt	24	5.0	0.30223142345077614	3.040508989778258
Obs_GFP_Phall_Rhod_Nano2_488_1.czi_intensities.txt	25	5.0	0.2941479280825252	3.0990036344624623
Obs_GFP_Phall_Rhod_Nano2_488_1.czi_intensities.txt	26	5.0	0.3262358548455437	3.1622012637161943
Obs_GFP_Phall_Rhod_Nano2_488_1.czi_intensities.txt	27	6.0	0.2768238630839021	2.9810032710756125
Obs_GFP_Phall_Rhod_Nano2_488_1.czi_intensities.txt	28	6.0	0.2959583873606344	3.008234014748422
Obs_GFP_Phall_Rhod_Nano2_488_1.czi_intensities.txt	29	6.0	0.2998256227095585	2.9265504743736304
Obs_GFP_Phall_Rhod_Nano2_488_1.czi_intensities.txt	30	7.0	0.31009224729411333	3.0256867873369764
Obs_GFP_Phall_Rhod_Nano2_488_1.czi_intensities.txt	31	7.0	0.23904761824900286	2.852406603633705
Obs_GFP_Phall_Rhod_Nano2_488_1.czi_intensities.txt	32	8.0	0.30716031696669965	2.7055195621830346
Obs_GFP_Phall_Rhod_Nano2_488_1.czi_intensities.txt	33	8.0	0.42097270001871884	2.8352952757839898
Obs_GFP_Phall_Rhod_Nano2_488_1.czi_intensities.txt	34	8.0	0.2647683695625867	2.7973774100102946
Obs_GFP_Phall_Rhod_Nano2_488_1.czi_intensities.txt	35	8.0	0.25950330371509067	2.5690795010300453
Obs_GFP_Phall_Rhod_Nano2_488_1.czi_intensities.txt	36	9.0	0.33193844737697165	2.552344124755153
Obs_GFP_Phall_Rhod_Nano2_488_1.czi_intensities.txt	37	9.0	0.212986475102189	2.609630454307005
Obs_GFP_Phall_Rhod_Nano2_488_1.czi_intensities.txt	38	9.0	0.26418258586328147	2.6534193169757194
Obs_GFP_Phall_Rhod_Nano2_488_2.czi_intensities.txt	1	2.0	0.9872138788600131	5.5769355593243075
Obs_GFP_Phall_Rhod_Nano2_488_2.czi_intensities.txt	2	2.0	1.003290293672707	5.583019676470253
Obs_GFP_Phall_Rhod_Nano2_488_2.czi_intensities.txt	3	2.0	0.8993282263838643	5.672381421000135
Obs_GFP_Phall_Rhod_Nano2_488_2.czi_intensities.txt	4	2.0	0.931033371372703	5.6203764631333195
Obs_GFP_Phall_Rhod_Nano2_488_2.czi_intensities.txt	5	2.0	0.9260200976170168	5.6944173910795355
Obs_GFP_Phall_Rhod_Nano2_488_2.czi_intensities.txt	6	2.0	0.9213569417369356	6.065088834367031
Obs_GFP_Phall_Rhod_Nano2_488_2.czi_intensities.txt	7	2.0	0.989243099171645	5.925349408997958
Obs_GFP_Phall_Rhod_Nano2_488_2.czi_intensities.txt	8	2.0	0.9440049806726345	5.76434772134738
Obs_GFP_Phall_Rhod_Nano2_488_2.czi_intensities.txt	9	2.0	1.0807692990305666	5.435843785873868
Obs_GFP_Phall_Rhod_Nano2_488_2.czi_intensities.txt	10	3.0	1.0403481554033287	5.646921997465522
Obs_GFP_Phall_Rhod_Nano2_488_2.czi_intensities.txt	11	3.0	0.9042158101316298	5.480547449301271
Obs_GFP_Phall_Rhod_Nano2_488_2.czi_intensities.txt	12	3.0	0.7538502199848401	5.482679838765839
Obs_GFP_Phall_Rhod_Nano2_488_2.czi_intensities.txt	13	3.0	0.7530268086660441	5.431954860383656
Obs_GFP_Phall_Rhod_Nano2_488_2.czi_intensities.txt	14	3.0	0.8040007071539087	5.4282359545292955
Obs_GFP_Phall_Rhod_Nano2_488_2.czi_intensities.txt	15	3.0	0.7410983554573135	5.912641449174087
Obs_GFP_Phall_Rhod_Nano2_488_2.czi_intensities.txt	16	3.0	0.8889612169663538	5.800288943339829
Obs_GFP_Phall_Rhod_Nano2_488_2.czi_intensities.txt	17	3.0	0.9513248191291633	5.555978440209075
Obs_GFP_Phall_Rhod_Nano2_488_2.czi_intensities.txt	18	3.0	0.8316245742242638	5.3990192498613245
Obs_GFP_Phall_Rhod_Nano2_488_2.czi_intensities.txt	19	4.0	1.2871430874520169	4.925923828532936
Obs_GFP_Phall_Rhod_Nano2_488_2.czi_intensities.txt	20	4.0	0.7511481687359648	5.210163108892665
Obs_GFP_Phall_Rhod_Nano2_488_2.czi_intensities.txt	21	4.0	0.8240276773693443	5.414202217998221
Obs_GFP_Phall_Rhod_Nano2_488_2.czi_intensities.txt	22	5.0	0.7222458557555469	5.111004829090954
Obs_GFP_Phall_Rhod_Nano2_488_2.czi_intensities.txt	23	5.0	0.7869050642454714	5.059562013365218
Obs_GFP_Phall_Rhod_Nano2_488_2.czi_intensities.txt	24	5.0	0.7248311530719761	4.9201093619268645
Obs_GFP_Phall_Rhod_Nano2_488_2.czi_intensities.txt	25	6.0	0.6110329712136989	4.728408575633669
Obs_GFP_Phall_Rhod_Nano2_488_2.czi_intensities.txt	26	6.0	0.6441974979166479	4.5447640761196215
Obs_GFP_Phall_Rhod_Nano2_488_2.czi_intensities.txt	27	6.0	0.7246911724022682	4.67153249184965
Obs_GFP_Phall_Rhod_Nano2_488_2.czi_intensities.txt	28	6.0	0.6334754569291685	4.771056063088929
Obs_GFP_Phall_Rhod_Nano2_488_2.czi_intensities.txt	29	6.0	0.6927188103656231	4.888422729238554
Obs_GFP_Phall_Rhod_Nano2_488_2.czi_intensities.txt	30	6.0	0.5865496321739111	4.838203078002177
Obs_GFP_Phall_Rhod_Nano2_488_2.czi_intensities.txt	31	7.0	0.8521451347145858	4.223067372846637
Obs_GFP_Phall_Rhod_Nano2_488_2.czi_intensities.txt	32	7.0	0.5307194770319216	4.227458186454512
Obs_GFP_Phall_Rhod_Nano2_488_2.czi_intensities.txt	33	7.0	0.5898349043142883	4.498115786143482
Obs_GFP_Phall_Rhod_Nano2_488_2.czi_intensities.txt	34	7.0	0.6265130678376807	4.598847642166576
Obs_GFP_Phall_Rhod_Nano2_488_2.czi_intensities.txt	35	7.0	0.6254839997830356	4.550701908585066
Obs_GFP_Phall_Rhod_Nano2_488_2.czi_intensities.txt	36	7.0	0.7294555030599008	4.609727821153818
Obs_GFP_Phall_Rhod_Nano2_488_2.czi_intensities.txt	37	8.0	0.5044510082421138	4.353368264522204
Obs_GFP_Phall_Rhod_Nano2_488_2.czi_intensities.txt	38	8.0	0.5216898977996849	4.162302022608562
Obs_GFP_Phall_Rhod_Nano2_488_2.czi_intensities.txt	39	8.0	0.5625141197113613	4.25533217730524
Obs_GFP_Phall_Rhod_Nano2_488_2.czi_intensities.txt	40	8.0	0.5040019221054843	4.135422610569342
Obs_GFP_Phall_Rhod_Nano2_488_2.czi_intensities.txt	41	8.0	0.6332756857653512	4.362474348098074
Obs_GFP_Phall_Rhod_Nano2_488_2.czi_intensities.txt	42	9.0	0.48742631430003325	4.056062728969222
Obs_GFP_Phall_Rhod_Nano2_488_2.czi_intensities.txt	43	9.0	0.5467465866985256	4.08388412337841
Obs_GFP_Phall_Rhod_Nano2_488_2.czi_intensities.txt	44	9.0	0.5602442963579415	3.80972231371593
Obs_GFP_Phall_Rhod_Nano2_488_2.czi_intensities.txt	45	9.0	0.5652881195935676	4.2269986284730825
Obs_GFP_Phall_Rhod_Nano2_488_2.czi_intensities.txt	47	10.0	0.48551504078279084	3.341249324886309
Obs_GFP_Phall_Rhod_Nano2_488_2.czi_intensities.txt	48	10.0	0.39070302410149516	4.128884848110701
Obs_GFP_Phall_Rhod_Nano2_488_2.czi_intensities.txt	49	10.0	0.4851580446611728	3.9268075045290174
Obs_GFP_Phall_Rhod_Nano2_488_2.czi_intensities.txt	50	10.0	0.4295023355209985	4.041018952125337
Obs_GFP_Phall_Rhod_Nano2_488_2.czi_intensities.txt	51	10.0	0.5313156373732086	4.299923772851799
Obs_GFP_Phall_Rhod_Nano2_488_2.czi_intensities.txt	52	11.0	0.4143820111003795	3.039322768849724
Obs_GFP_Phall_Rhod_Nano2_488_2.czi_intensities.txt	53	11.0	0.45257775161835895	3.850096605763966
Obs_GFP_Phall_Rhod_Nano2_488_2.czi_intensities.txt	54	11.0	0.5331049729590377	3.69561593233899
Obs_GFP_Phall_Rhod_Nano2_488_2.czi_intensities.txt	56	12.0	0.4680300107171344	3.552140449670157
Obs_GFP_Phall_Rhod_Nano2_488_2.czi_intensities.txt	57	12.0	0.4836780898108329	3.7555935664825597
Obs_GFP_Phall_Rhod_Nano2_488_2.czi_intensities.txt	58	12.0	0.4415369710438047	3.8122175999209427
Obs_GFP_Phall_Rhod_Nano2_488_2.czi_intensities.txt	59	13.0	0.37503063792314906	3.419142102706852
Obs_GFP_Phall_Rhod_Nano2_488_2.czi_intensities.txt	60	13.0	0.43429912830574163	3.502762690919299
Obs_GFP_Phall_Rhod_Nano2_488_2.czi_intensities.txt	62	13.0	0.6626123261160919	3.734208788535262
Obs_GFP_Phall_Rhod_Nano2_488_2.czi_intensities.txt	63	14.0	0.45914477519345337	3.0754827345703966
Obs_GFP_Phall_Rhod_Nano2_488_2.czi_intensities.txt	64	14.0	0.39953257165074674	3.559301004301237
Obs_GFP_Phall_Rhod_Nano2_488_2.czi_intensities.txt	65	14.0	0.37159711326356865	3.3803914491724174
Obs_GFP_Phall_Rhod_Nano2_488_2.czi_intensities.txt	66	14.0	0.5517091917836012	3.366156773972616
Obs_GFP_Phall_Rhod_Kettin_488_4.czi_intensities.txt	1	2.0	3.3146941904221903	3.244341035046597
Obs_GFP_Phall_Rhod_Kettin_488_4.czi_intensities.txt	2	2.0	3.2861797402629143	3.7229256637992783
Obs_GFP_Phall_Rhod_Kettin_488_4.czi_intensities.txt	3	2.0	3.1708528661638833	4.192440870396309
Obs_GFP_Phall_Rhod_Kettin_488_4.czi_intensities.txt	4	2.0	3.2651291461412604	4.757577634649
Obs_GFP_Phall_Rhod_Kettin_488_4.czi_intensities.txt	5	2.0	3.2078943204353165	5.002207258589368
Obs_GFP_Phall_Rhod_Kettin_488_4.czi_intensities.txt	6	2.0	3.287307502761202	5.366554700520778
Obs_GFP_Phall_Rhod_Kettin_488_4.czi_intensities.txt	7	2.0	3.383128295588074	4.698637307387971
Obs_GFP_Phall_Rhod_Kettin_488_4.czi_intensities.txt	8	2.0	3.216138484259777	5.478703450428322
Obs_GFP_Phall_Rhod_Kettin_488_4.czi_intensities.txt	9	2.0	3.1772722600318644	4.622163407785965
Obs_GFP_Phall_Rhod_Kettin_488_4.czi_intensities.txt	10	2.0	3.2553747283124843	5.074713587660184
Obs_GFP_Phall_Rhod_Kettin_488_4.czi_intensities.txt	11	2.0	3.230109487283805	4.435218879145277
Obs_GFP_Phall_Rhod_Kettin_488_4.czi_intensities.txt	12	2.0	3.289985907086997	4.859133696647653
Obs_GFP_Phall_Rhod_Kettin_488_4.czi_intensities.txt	13	3.0	2.536787986326492	3.1775381926832957
Obs_GFP_Phall_Rhod_Kettin_488_4.czi_intensities.txt	14	3.0	2.8841533688495042	4.269889980432717
Obs_GFP_Phall_Rhod_Kettin_488_4.czi_intensities.txt	15	3.0	2.9530208111948197	4.694668358266378
Obs_GFP_Phall_Rhod_Kettin_488_4.czi_intensities.txt	16	3.0	2.809772323255049	4.477894651783607
Obs_GFP_Phall_Rhod_Kettin_488_4.czi_intensities.txt	17	3.0	2.8743731629326215	4.358889087953008
Obs_GFP_Phall_Rhod_Kettin_488_4.czi_intensities.txt	18	3.0	2.835023171253622	3.962123159541666
Obs_GFP_Phall_Rhod_Kettin_488_4.czi_intensities.txt	19	3.0	2.764904334909354	4.402574082716675
Obs_GFP_Phall_Rhod_Kettin_488_4.czi_intensities.txt	20	4.0	2.3154288848337536	2.879108214627181
Obs_GFP_Phall_Rhod_Kettin_488_4.czi_intensities.txt	21	4.0	2.4619836359073677	3.5015482485625693
Obs_GFP_Phall_Rhod_Kettin_488_4.czi_intensities.txt	22	4.0	2.429180070330702	3.6170801465397604
Obs_GFP_Phall_Rhod_Kettin_488_4.czi_intensities.txt	23	5.0	2.2768175455495183	3.6476218496301964
Obs_GFP_Phall_Rhod_Kettin_488_4.czi_intensities.txt	24	5.0	2.545417777147672	4.187672280628912
Obs_GFP_Phall_Rhod_Kettin_488_4.czi_intensities.txt	25	5.0	1.9623678014863997	3.5354376968250456
Obs_GFP_Phall_Rhod_Kettin_488_4.czi_intensities.txt	26	6.0	1.758356138686918	3.0652588847328217
Obs_GFP_Phall_Rhod_Kettin_488_4.czi_intensities.txt	27	6.0	1.880731744380439	3.8719362154675183
Obs_GFP_Phall_Rhod_Kettin_488_4.czi_intensities.txt	28	6.0	1.907194410592297	3.977805343472955
Obs_GFP_Phall_Rhod_Kettin_488_4.czi_intensities.txt	29	6.0	2.0656228419866567	2.9639888313665534
Obs_GFP_Phall_Rhod_Kettin_488_4.czi_intensities.txt	30	6.0	2.108656107701534	2.8227753133563764
Obs_GFP_Phall_Rhod_Kettin_488_4.czi_intensities.txt	31	6.0	2.0814418963674	2.7262945987933387
Obs_GFP_Phall_Rhod_Kettin_488_4.czi_intensities.txt	32	6.0	1.8896083748163517	2.9540589933419
Obs_GFP_Phall_Rhod_Kettin_488_4.czi_intensities.txt	33	7.0	1.7232166902126607	1.9156389316077276
Obs_GFP_Phall_Rhod_Kettin_488_4.czi_intensities.txt	34	7.0	1.6024916478245375	3.478502653791729
Obs_GFP_Phall_Rhod_Kettin_488_4.czi_intensities.txt	35	7.0	1.8075730660516467	2.473571178371093
Obs_GFP_Phall_Rhod_Kettin_488_4.czi_intensities.txt	36	7.0	1.6408419817846396	2.3647373970767864
Obs_GFP_Phall_Rhod_Kettin_488_4.czi_intensities.txt	37	8.0	1.6348406839806244	1.4320052165828403
Obs_GFP_Phall_Rhod_Kettin_488_4.czi_intensities.txt	38	8.0	1.4062763846795376	1.5676992568441106
Obs_GFP_Phall_Rhod_Kettin_488_4.czi_intensities.txt	39	8.0	1.4908638675581007	2.5650908093431575
Obs_GFP_Phall_Rhod_Kettin_488_4.czi_intensities.txt	40	8.0	1.6541353517153166	1.9975250646876763
Obs_GFP_Phall_Rhod_Kettin_488_4.czi_intensities.txt	41	9.0	1.3802174561718619	1.9407078772416086
Obs_GFP_Phall_Rhod_Kettin_488_4.czi_intensities.txt	42	9.0	1.5175817776752276	2.7311882171797772
Obs_GFP_Phall_Rhod_Kettin_488_4.czi_intensities.txt	43	9.0	1.4879826280148303	1.3693978301452427
Obs_GFP_Phall_Rhod_Kettin_488_4.czi_intensities.txt	44	10.0	1.2610239623638129	1.2741998354812325
Obs_GFP_Phall_Rhod_Kettin_488_4.czi_intensities.txt	45	10.0	1.2511979287275834	2.530907735778665
Obs_GFP_Phall_Rhod_Kettin_488_4.czi_intensities.txt	46	10.0	1.346783150786133	1.6999444575729907
Obs_GFP_Phall_Rhod_Kettin_488_4.czi_intensities.txt	47	10.0	1.1507273872920576	1.2855243372641394
Obs_GFP_Phall_Rhod_Kettin_488_4.czi_intensities.txt	48	10.0	1.5584951576306916	1.1361312240854966
Obs_GFP_Phall_Rhod_Kettin_488_4.czi_intensities.txt	49	11.0	1.1642199138599627	1.6441948628124485
Obs_GFP_Phall_Rhod_Kettin_488_4.czi_intensities.txt	50	11.0	1.1626178017039948	1.3608635003514447
Obs_GFP_Phall_Rhod_Kettin_488_4.czi_intensities.txt	51	11.0	1.2903662937003617	1.4555307464697405
Obs_GFP_Phall_Rhod_Kettin_488_4.czi_intensities.txt	52	11.0	1.2900520713698957	1.2002843682125286
Obs_GFP_Phall_Rhod_Kettin_488_4.czi_intensities.txt	53	12.0	1.1654222862639463	1.2647205131302728
Obs_GFP_Phall_Rhod_Kettin_488_4.czi_intensities.txt	54	12.0	1.0209768612830903	2.0386718978263363
Obs_GFP_Phall_Rhod_Kettin_488_4.czi_intensities.txt	55	12.0	1.06682164873497	1.1764347004935078
Obs_GFP_Phall_Rhod_Kettin_488_4.czi_intensities.txt	56	12.0	1.1425777762177	0.9915931506352378
Obs_GFP_Phall_Rhod_Kettin_488_4.czi_intensities.txt	57	13.0	0.9355923552702157	1.7171587621104751
Obs_GFP_Phall_Rhod_Kettin_488_4.czi_intensities.txt	58	13.0	0.9386417813525486	1.0722276331056
Obs_GFP_Phall_Rhod_Kettin_488_4.czi_intensities.txt	59	13.0	1.0050378599165917	1.187279213114037
Obs_GFP_Phall_Rhod_Kettin_488_4.czi_intensities.txt	60	14.0	1.009683246982812	0.7945697505581623
Obs_GFP_Phall_Rhod_Kettin_488_4.czi_intensities.txt	61	15.0	0.9866678471809405	1.3508289704126002
Obs_GFP_Phall_Rhod_Kettin_488_4.czi_intensities.txt	62	15.0	0.9086290341130707	0.643767869244642
Obs_GFP_Phall_Rhod_Kettin_488_4.czi_intensities.txt	63	15.0	0.9646740869121994	0.7347629842456629
Obs_GFP_Phall_Rhod_Kettin_488_4.czi_intensities.txt	64	15.0	0.9368223148450079	0.6892473120733313
Obs_GFP_Phall_Rhod_Kettin_488_4.czi_intensities.txt	65	15.0	0.9864887125612245	0.704084434087986
Obs_GFP_Phall_Rhod_Kettin_488_4.czi_intensities.txt	66	16.0	0.8580409480323745	1.1010699869372098
Obs_GFP_Phall_Rhod_Kettin_488_4.czi_intensities.txt	67	16.0	0.765702212281774	0.6982043295667625
Obs_GFP_Phall_Rhod_Kettin_488_4.czi_intensities.txt	68	16.0	1.1243852012974769	0.6382844537080513
Obs_GFP_Phall_Rhod_Kettin_488_4.czi_intensities.txt	69	17.0	0.8144101852904191	0.8206553791976449
Obs_GFP_Phall_Rhod_Kettin_488_4.czi_intensities.txt	70	17.0	0.7570024041451622	0.5305949342366889
Obs_GFP_Phall_Rhod_Kettin_488_4.czi_intensities.txt	71	18.0	0.7815571086336325	0.559611615647915
Obs_GFP_Phall_Rhod_Kettin_488_4.czi_intensities.txt	72	18.0	0.8289857172802828	0.4076779898316818
Obs_GFP_Phall_Rhod_Kettin_488_4.czi_intensities.txt	73	19.0	0.7645454552515697	0.48010355433794083
Obs_GFP_Phall_Rhod_Kettin_488_4.czi_intensities.txt	74	19.0	0.8134596666724141	0.45077486235879605
Obs_GFP_Phall_Rhod_Kettin_488_4.czi_intensities.txt	75	19.0	0.6984174371498397	0.44200249477220827
Obs_GFP_Phall_Rhod_Kettin_488_5.czi_intensities.txt	1	1.0	0.7875682702132129	5.290630642335903
Obs_GFP_Phall_Rhod_Kettin_488_5.czi_intensities.txt	2	1.0	0.8616031609183956	5.557573655413652
Obs_GFP_Phall_Rhod_Kettin_488_5.czi_intensities.txt	3	1.0	0.8478010820079047	5.6265469004803705
Obs_GFP_Phall_Rhod_Kettin_488_5.czi_intensities.txt	4	1.0	0.765015559442279	5.632189647562843
Obs_GFP_Phall_Rhod_Kettin_488_5.czi_intensities.txt	5	1.0	0.7191612616230162	5.4844148757823215
Obs_GFP_Phall_Rhod_Kettin_488_5.czi_intensities.txt	6	1.0	0.9408006536917127	5.41419103711089
Obs_GFP_Phall_Rhod_Kettin_488_5.czi_intensities.txt	7	1.0	0.9896915720388801	5.884672268918892
Obs_GFP_Phall_Rhod_Kettin_488_5.czi_intensities.txt	8	2.0	0.7279968664143254	5.112072988044265
Obs_GFP_Phall_Rhod_Kettin_488_5.czi_intensities.txt	9	2.0	0.6972933150496761	4.978049743204143
Obs_GFP_Phall_Rhod_Kettin_488_5.czi_intensities.txt	10	2.0	0.8015184320909794	5.550164559914894
Obs_GFP_Phall_Rhod_Kettin_488_5.czi_intensities.txt	11	2.0	1.0356864869242577	5.348256501061607
Obs_GFP_Phall_Rhod_Kettin_488_5.czi_intensities.txt	12	3.0	0.5561464498022903	4.231006055834589
Obs_GFP_Phall_Rhod_Kettin_488_5.czi_intensities.txt	13	3.0	0.6435821818189994	5.076275534886483
Obs_GFP_Phall_Rhod_Kettin_488_5.czi_intensities.txt	14	4.0	0.6689673670057781	2.606386287570881
Obs_GFP_Phall_Rhod_Kettin_488_5.czi_intensities.txt	15	4.0	0.8545507382290471	3.8067184080240377
Obs_GFP_Phall_Rhod_Kettin_488_5.czi_intensities.txt	16	4.0	0.8041286388206592	5.265070057674255
Obs_GFP_Phall_Rhod_Kettin_488_5.czi_intensities.txt	17	5.0	0.6455494033575003	4.4493395295722244
Obs_GFP_Phall_Rhod_Kettin_488_5.czi_intensities.txt	18	5.0	0.6714667417541486	3.4711207119657783
Obs_GFP_Phall_Rhod_Kettin_488_5.czi_intensities.txt	19	5.0	0.7364643322528808	3.3663874861656895
Obs_GFP_Phall_Rhod_Kettin_488_5.czi_intensities.txt	20	5.0	0.6738184895397437	3.642198183772672
Obs_GFP_Phall_Rhod_Kettin_488_5.czi_intensities.txt	21	5.0	0.7458489187264389	4.528732331171705
Obs_GFP_Phall_Rhod_Kettin_488_5.czi_intensities.txt	22	5.0	0.6815776249700071	4.624998072515727
Obs_GFP_Phall_Rhod_Kettin_488_5.czi_intensities.txt	23	6.0	0.5942219975653499	2.6804834697110094
Obs_GFP_Phall_Rhod_Kettin_488_5.czi_intensities.txt	24	6.0	0.5428837809121714	2.7435817816179013
Obs_GFP_Phall_Rhod_Kettin_488_5.czi_intensities.txt	25	6.0	0.49541319082498875	2.7191110865774712
Obs_GFP_Phall_Rhod_Kettin_488_5.czi_intensities.txt	26	6.0	0.6733068535368893	3.1222288546116483
Obs_GFP_Phall_Rhod_Kettin_488_5.czi_intensities.txt	27	6.0	0.604383317395299	3.887687461028585
Obs_GFP_Phall_Rhod_Kettin_488_5.czi_intensities.txt	28	6.0	0.7561306266734343	4.644203307228712
Obs_GFP_Phall_Rhod_Kettin_488_5.czi_intensities.txt	29	7.0	0.64555093792801	2.219366029512922
Obs_GFP_Phall_Rhod_Kettin_488_5.czi_intensities.txt	30	7.0	0.5150072443914993	2.193038313545931
Obs_GFP_Phall_Rhod_Kettin_488_5.czi_intensities.txt	31	7.0	0.6330726685291873	3.7667090592215637
Obs_GFP_Phall_Rhod_Kettin_488_5.czi_intensities.txt	32	8.0	0.5941773603940513	3.4233865934470695
Obs_GFP_Phall_Rhod_Kettin_488_5.czi_intensities.txt	33	8.0	0.639634682165268	1.9157557329977928
Obs_GFP_Phall_Rhod_Kettin_488_5.czi_intensities.txt	34	8.0	0.6184370127048495	1.8197538532981892
Obs_GFP_Phall_Rhod_Kettin_488_5.czi_intensities.txt	35	8.0	0.6099564919467514	2.9284300572225113
Obs_GFP_Phall_Rhod_Kettin_488_5.czi_intensities.txt	36	9.0	0.5319337879935357	3.3643952787592637
Obs_GFP_Phall_Rhod_Kettin_488_5.czi_intensities.txt	37	9.0	0.5603515668251723	2.0865557807595843
Obs_GFP_Phall_Rhod_Kettin_488_5.czi_intensities.txt	38	9.0	0.5678395920962759	1.9512568647367625
Obs_GFP_Phall_Rhod_Kettin_488_5.czi_intensities.txt	39	9.0	0.53740286233998	1.7364925902151496
Obs_GFP_Phall_Rhod_Kettin_488_5.czi_intensities.txt	40	9.0	0.5695119986365629	1.9243432796686426
Obs_GFP_Phall_Rhod_Kettin_488_5.czi_intensities.txt	41	9.0	0.5692714826544103	2.3344975480087986
Obs_GFP_Phall_Rhod_Kettin_488_5.czi_intensities.txt	42	9.0	0.5997386028378803	2.758474175225415
Obs_GFP_Phall_Rhod_Kettin_488_5.czi_intensities.txt	43	10.0	0.5842753229716622	1.8038620965282008
Obs_GFP_Phall_Rhod_Kettin_488_5.czi_intensities.txt	44	10.0	0.486994276759935	1.9381089141961323
Obs_GFP_Phall_Rhod_Kettin_488_5.czi_intensities.txt	45	10.0	0.5128001337247062	1.670250525607045
Obs_GFP_Phall_Rhod_Kettin_488_5.czi_intensities.txt	46	10.0	0.42655077996509116	1.5275274393984952
Obs_GFP_Phall_Rhod_Kettin_488_5.czi_intensities.txt	47	10.0	0.44281986649831295	1.658644073039529
Obs_GFP_Phall_Rhod_Kettin_488_5.czi_intensities.txt	48	10.0	0.5609545027523769	1.4339277763948541
Obs_GFP_Phall_Rhod_Kettin_488_5.czi_intensities.txt	49	10.0	0.4910465201774535	2.035815667351731
Obs_GFP_Phall_Rhod_Kettin_488_5.czi_intensities.txt	50	10.0	0.5791675716974333	2.381058889546669
Obs_GFP_Phall_Rhod_Kettin_488_5.czi_intensities.txt	51	11.0	0.48598424245282423	1.6626897410061394
Obs_GFP_Phall_Rhod_Kettin_488_5.czi_intensities.txt	52	11.0	0.41722978156798485	1.3342384195889176
Obs_GFP_Phall_Rhod_Kettin_488_5.czi_intensities.txt	53	11.0	0.4626828464880426	1.1983936241366058
Obs_GFP_Phall_Rhod_Kettin_488_5.czi_intensities.txt	54	11.0	0.33744510532288463	1.4018697329016756
Obs_GFP_Phall_Rhod_Kettin_488_5.czi_intensities.txt	55	11.0	0.5901560646659574	3.135484994240348
Obs_GFP_Phall_Rhod_Kettin_488_5.czi_intensities.txt	56	12.0	0.5461489537658636	0.8295761428610167
Obs_GFP_Phall_Rhod_Kettin_488_5.czi_intensities.txt	57	12.0	0.48124289775286305	2.217094114612449
Obs_GFP_Phall_Rhod_Kettin_488_5.czi_intensities.txt	58	12.0	0.4694046364706926	1.004991496521662
Obs_GFP_Phall_Rhod_Kettin_488_5.czi_intensities.txt	59	12.0	0.5067326232340055	1.178710015246185
Obs_GFP_Phall_Rhod_Kettin_488_5.czi_intensities.txt	61	13.0	0.552289011046238	0.8431770999694445
Obs_GFP_Phall_Rhod_Kettin_488_5.czi_intensities.txt	62	13.0	0.44723326834736593	1.2092337022707838
Obs_GFP_Phall_Rhod_Kettin_488_5.czi_intensities.txt	63	13.0	0.48661508339131887	1.0392182624856765
Obs_GFP_Phall_Rhod_Kettin_488_5.czi_intensities.txt	64	13.0	0.4648165893525569	0.9941751102209421
Obs_GFP_Phall_Rhod_Kettin_488_5.czi_intensities.txt	65	13.0	0.5121858357567411	0.9629609744678994
Obs_GFP_Phall_Rhod_Kettin_488_5.czi_intensities.txt	66	13.0	0.5418279472622536	1.2214392444964481
Obs_GFP_Phall_Rhod_Kettin_488_5.czi_intensities.txt	67	13.0	0.5689299582105353	1.5961494151400575
Obs_GFP_Phall_Rhod_Kettin_488_5.czi_intensities.txt	68	14.0	0.5106513999007488	0.770058635626659
Obs_GFP_Phall_Rhod_Kettin_488_5.czi_intensities.txt	69	14.0	0.4693178976682598	1.3098734570455413
Obs_GFP_Phall_Rhod_Kettin_488_5.czi_intensities.txt	70	14.0	0.47493005543790057	1.1125663892785826
Obs_GFP_Phall_Rhod_Kettin_488_5.czi_intensities.txt	71	14.0	0.5208444869420384	1.3976703707965588
Obs_GFP_Phall_Rhod_Kettin_488_5.czi_intensities.txt	72	15.0	0.4619901087381332	1.7473322972851681
Obs_GFP_Phall_Rhod_Kettin_488_5.czi_intensities.txt	73	15.0	0.43509569908602436	1.3652056112255742
Obs_GFP_Phall_Rhod_Kettin_488_5.czi_intensities.txt	74	15.0	0.4361045599660188	0.828791197257309
Obs_GFP_Phall_Rhod_Kettin_488_5.czi_intensities.txt	75	16.0	0.438006102785732	1.5684569235929484
Obs_GFP_Phall_Rhod_Kettin_488_5.czi_intensities.txt	76	16.0	0.42317905064492745	0.7866578272426409
Obs_GFP_Phall_Rhod_Kettin_488_5.czi_intensities.txt	77	16.0	0.42733510549943415	0.6249393484509044
Obs_GFP_Phall_Rhod_Kettin_488_5.czi_intensities.txt	78	16.0	0.41782106594855406	0.6346188380259907
Obs_GFP_Phall_Rhod_Kettin_488_5.czi_intensities.txt	79	16.0	0.4753076244659541	1.4164511622223261
Obs_GFP_Phall_Rhod_Kettin_488_5.czi_intensities.txt	80	17.0	0.4832031805728404	0.3187892426071479
Obs_GFP_Phall_Rhod_Kettin_488_5.czi_intensities.txt	81	17.0	0.4151715007806467	0.7149463881797716
Obs_GFP_Phall_Rhod_Kettin_488_5.czi_intensities.txt	82	17.0	0.3690683996435098	0.5619241954282387
Obs_GFP_Phall_Rhod_Kettin_488_5.czi_intensities.txt	83	17.0	0.4589743191749575	0.9780899463949637
Obs_GFP_Phall_Rhod_Kettin_488_5.czi_intensities.txt	84	17.0	0.40849826879957973	1.150686831674835
Obs_GFP_Phall_Rhod_Kettin_488_5.czi_intensities.txt	85	18.0	0.37460287382981283	0.9614275324860395
Obs_GFP_Phall_Rhod_Kettin_488_5.czi_intensities.txt	86	18.0	0.35731375935153087	0.6694414242237973
Obs_GFP_Phall_Rhod_Kettin_488_5.czi_intensities.txt	87	18.0	0.4283590938288563	0.5531709882261244
Obs_GFP_Phall_Rhod_Kettin_488_5.czi_intensities.txt	88	19.0	0.5389466711803486	0.21129262392389953
Obs_GFP_Phall_Rhod_Kettin_488_5.czi_intensities.txt	89	19.0	0.32636598221779917	0.9412884481087104
Obs_GFP_Phall_Rhod_Kettin_488_5.czi_intensities.txt	90	19.0	0.41155035562259107	1.0256991051150102
Obs_GFP_Phall_Rhod_Kettin_488_5.czi_intensities.txt	91	19.0	0.3349377843346117	0.8760270745914488
Obs_GFP_Phall_Rhod_Kettin_488_5.czi_intensities.txt	92	19.0	0.3868363005244959	0.4697727738280152
Obs_GFP_Phall_Rhod_Kettin_488_5.czi_intensities.txt	93	19.0	0.3731136110180779	0.6865922945037837
Obs_GFP_Phall_Rhod_Kettin_488_5.czi_intensities.txt	94	20.0	0.3606855137390822	0.88750946576961
Obs_GFP_Phall_Rhod_Kettin_488_5.czi_intensities.txt	95	20.0	0.389613629777799	0.9286936204263552
Obs_GFP_Phall_Rhod_Kettin_488_5.czi_intensities.txt	96	20.0	0.32567939445395716	0.41499142954824836
Obs_GFP_Phall_Rhod_Kettin_488_5.czi_intensities.txt	97	20.0	0.457559680860846	0.5549787590123697
Obs_GFP_Phall_Rhod_Kettin_488_6.czi_intensities.txt	1	2.0	1.3844278389663431	1.3779895224024874
Obs_GFP_Phall_Rhod_Kettin_488_6.czi_intensities.txt	2	2.0	1.2622953643688093	1.261249588820817
Obs_GFP_Phall_Rhod_Kettin_488_6.czi_intensities.txt	3	2.0	1.3898198694315882	1.2543490324982411
Obs_GFP_Phall_Rhod_Kettin_488_6.czi_intensities.txt	4	2.0	1.3522888079509732	2.4184917211484005
Obs_GFP_Phall_Rhod_Kettin_488_6.czi_intensities.txt	5	2.0	1.3151064118516647	2.4177238121417024
Obs_GFP_Phall_Rhod_Kettin_488_6.czi_intensities.txt	6	2.0	1.3434888552555182	2.1372125758136944
Obs_GFP_Phall_Rhod_Kettin_488_6.czi_intensities.txt	7	2.0	1.268755446019033	2.270105155684691
Obs_GFP_Phall_Rhod_Kettin_488_6.czi_intensities.txt	8	3.0	1.206481259950614	1.1675116518283928
Obs_GFP_Phall_Rhod_Kettin_488_6.czi_intensities.txt	9	3.0	1.3080310102088941	1.7924922233909661
Obs_GFP_Phall_Rhod_Kettin_488_6.czi_intensities.txt	10	3.0	1.2270721728219234	1.7935674716867736
Obs_GFP_Phall_Rhod_Kettin_488_6.czi_intensities.txt	11	4.0	1.1795461326715306	1.7622005767433666
Obs_GFP_Phall_Rhod_Kettin_488_6.czi_intensities.txt	12	4.0	1.1891593828367215	1.8444547340062554
Obs_GFP_Phall_Rhod_Kettin_488_6.czi_intensities.txt	13	4.0	1.1232305866852097	1.8828090052231468
Obs_GFP_Phall_Rhod_Kettin_488_6.czi_intensities.txt	14	4.0	1.1448369442960469	2.491507453812125
Obs_GFP_Phall_Rhod_Kettin_488_6.czi_intensities.txt	15	5.0	1.0755555941466544	1.2611323574806135
Obs_GFP_Phall_Rhod_Kettin_488_6.czi_intensities.txt	16	5.0	1.0915630874152045	0.8418116744077989
Obs_GFP_Phall_Rhod_Kettin_488_6.czi_intensities.txt	17	5.0	1.1719999758148307	1.333536707451752
Obs_GFP_Phall_Rhod_Kettin_488_6.czi_intensities.txt	18	5.0	0.9663037419264697	1.5624683059105016
Obs_GFP_Phall_Rhod_Kettin_488_6.czi_intensities.txt	19	5.0	0.9622759438130893	1.3876561679820891
Obs_GFP_Phall_Rhod_Kettin_488_6.czi_intensities.txt	20	6.0	1.0061335826746174	0.9077575140905955
Obs_GFP_Phall_Rhod_Kettin_488_6.czi_intensities.txt	21	6.0	1.0977796457472284	1.3767555639803137
Obs_GFP_Phall_Rhod_Kettin_488_6.czi_intensities.txt	22	6.0	1.0629440793127467	1.2577672444479178
Obs_GFP_Phall_Rhod_Kettin_488_6.czi_intensities.txt	23	7.0	0.9203663879881503	0.8100266290761929
Obs_GFP_Phall_Rhod_Kettin_488_6.czi_intensities.txt	24	7.0	1.0240707269136677	0.9968180165537264
Obs_GFP_Phall_Rhod_Kettin_488_6.czi_intensities.txt	25	7.0	0.9375737298649448	1.0169574717542205
Obs_GFP_Phall_Rhod_Kettin_488_6.czi_intensities.txt	26	7.0	0.9701773723318817	1.2446525435314326
Obs_GFP_Phall_Rhod_Kettin_488_6.czi_intensities.txt	27	8.0	0.8882739118139745	0.952723127209945
Obs_GFP_Phall_Rhod_Kettin_488_6.czi_intensities.txt	28	8.0	0.9673244713625495	0.6093513632597819
Obs_GFP_Phall_Rhod_Kettin_488_6.czi_intensities.txt	29	8.0	0.8720623193129913	0.7925584926283215
Obs_GFP_Phall_Rhod_Kettin_488_6.czi_intensities.txt	30	8.0	0.928383086559987	0.9094578086219727
Obs_GFP_Phall_Rhod_Kettin_488_6.czi_intensities.txt	31	9.0	0.868678886352644	0.9663316383646057
Obs_GFP_Phall_Rhod_Kettin_488_6.czi_intensities.txt	32	9.0	0.8402294170305105	0.6742308978882992
Obs_GFP_Phall_Rhod_Kettin_488_6.czi_intensities.txt	33	10.0	0.7562383147187633	0.46720014809083626
Obs_GFP_Phall_Rhod_Kettin_488_6.czi_intensities.txt	34	10.0	0.8036426114855926	0.543859451965327
Obs_GFP_Phall_Rhod_Kettin_488_6.czi_intensities.txt	35	10.0	0.7934604516645872	0.6070323612213079
Obs_GFP_Phall_Rhod_Kettin_488_6.czi_intensities.txt	36	11.0	0.6913711974826235	1.1732547658124994
Obs_GFP_Phall_Rhod_Kettin_488_6.czi_intensities.txt	37	11.0	0.7116687483019799	0.8921798337767216
Obs_GFP_Phall_Rhod_Kettin_488_6.czi_intensities.txt	38	11.0	0.7635447253534889	0.6358221767920713
Obs_GFP_Phall_Rhod_Kettin_488_6.czi_intensities.txt	39	11.0	0.7738367897970595	0.4976967168031253
Obs_GFP_Phall_Rhod_Kettin_488_6.czi_intensities.txt	40	11.0	0.827898354043354	0.6051404960713715
Obs_GFP_Phall_Rhod_Kettin_488_6.czi_intensities.txt	41	12.0	0.6962922352815566	1.10024252589097
Obs_GFP_Phall_Rhod_Kettin_488_6.czi_intensities.txt	42	12.0	0.6477335910266256	1.0245936152628423
Obs_GFP_Phall_Rhod_Kettin_488_6.czi_intensities.txt	43	12.0	0.7282938316234502	0.8621701329082754
Obs_GFP_Phall_Rhod_Kettin_488_6.czi_intensities.txt	44	12.0	0.6722382871951147	0.6923566137462142
Obs_GFP_Phall_Rhod_Kettin_488_6.czi_intensities.txt	45	12.0	0.7449240108077907	0.5617542526704726
Obs_GFP_Phall_Rhod_Kettin_488_6.czi_intensities.txt	46	12.0	0.728453279612352	0.6143943001406809
Obs_GFP_Phall_Rhod_Kettin_488_6.czi_intensities.txt	47	13.0	0.5967454716473581	0.7058058446963297
Obs_GFP_Phall_Rhod_Kettin_488_6.czi_intensities.txt	48	13.0	0.697971502354485	0.4306821993864384
Obs_GFP_Phall_Rhod_Kettin_488_6.czi_intensities.txt	49	13.0	0.6822575091528236	0.40443452146959474
Obs_GFP_Phall_Rhod_Kettin_488_6.czi_intensities.txt	50	14.0	0.6592323787864461	0.3290804738744692
Obs_GFP_Phall_Rhod_Kettin_488_6.czi_intensities.txt	51	14.0	0.6603665650755247	0.3545217958529639
Obs_GFP_Phall_Rhod_Kettin_488_6.czi_intensities.txt	52	14.0	0.6532784336506883	0.3549637257423887
Obs_GFP_Phall_Rhod_Kettin_488_6.czi_intensities.txt	53	14.0	0.7071790196113031	0.5368133900244041
Obs_GFP_Phall_Rhod_Kettin_488_6.czi_intensities.txt	54	15.0	0.6330796164812696	2.073917056866766
Obs_GFP_Phall_Rhod_Kettin_488_6.czi_intensities.txt	55	15.0	0.6083258146043165	0.9719039140454457
Obs_GFP_Phall_Rhod_Kettin_488_6.czi_intensities.txt	56	15.0	0.5978263849871335	0.27232452837372745
Obs_GFP_Phall_Rhod_Kettin_488_6.czi_intensities.txt	57	15.0	0.5950934991048024	0.3368074196989324
Obs_GFP_Phall_Rhod_Kettin_488_6.czi_intensities.txt	58	15.0	0.6782966589393884	0.39000651576150713
Obs_GFP_Phall_Rhod_Kettin_488_6.czi_intensities.txt	59	16.0	0.6188501982741562	0.30770248963486535
Obs_GFP_Phall_Rhod_Kettin_488_6.czi_intensities.txt	60	16.0	0.5807854409093418	0.2950091786617489
Obs_GFP_Phall_Rhod_Kettin_488_6.czi_intensities.txt	61	16.0	0.5835412694120542	0.26104900414807675
Obs_GFP_Phall_Rhod_Kettin_488_6.czi_intensities.txt	62	16.0	0.6131053971008148	0.3075687005181292
Obs_GFP_Phall_Rhod_Kettin_488_6.czi_intensities.txt	63	17.0	0.5483322827192146	0.5582299962659454
Obs_GFP_Phall_Rhod_Kettin_488_6.czi_intensities.txt	64	17.0	0.5546706703602153	0.3625097768592049
Obs_GFP_Phall_Rhod_Kettin_488_6.czi_intensities.txt	65	17.0	0.5435672456360406	0.2274821512235788
Obs_GFP_Phall_Rhod_Kettin_488_6.czi_intensities.txt	66	17.0	0.6009220995307982	0.2088631938775955
Obs_GFP_Phall_Rhod_Kettin_488_9.czi_intensities.txt	1	1.0	1.2271913187426857	2.5500595907813044
Obs_GFP_Phall_Rhod_Kettin_488_9.czi_intensities.txt	2	1.0	1.2167833798715506	2.51704362600342
Obs_GFP_Phall_Rhod_Kettin_488_9.czi_intensities.txt	3	1.0	1.2857270383220303	3.4034749209442627
Obs_GFP_Phall_Rhod_Kettin_488_9.czi_intensities.txt	4	1.0	1.2591866193900645	4.644073765487787
Obs_GFP_Phall_Rhod_Kettin_488_9.czi_intensities.txt	5	1.0	1.1648195529726695	6.1760152185527435
Obs_GFP_Phall_Rhod_Kettin_488_9.czi_intensities.txt	6	1.0	1.3244994841180275	6.26399296801395
Obs_GFP_Phall_Rhod_Kettin_488_9.czi_intensities.txt	7	1.0	1.340594550298479	4.288005127028847
Obs_GFP_Phall_Rhod_Kettin_488_9.czi_intensities.txt	8	1.0	1.2435489764703633	3.787058188581844
Obs_GFP_Phall_Rhod_Kettin_488_9.czi_intensities.txt	9	2.0	1.1606236442976727	2.8353321651620713
Obs_GFP_Phall_Rhod_Kettin_488_9.czi_intensities.txt	10	2.0	1.1553516233804046	2.236068470498229
Obs_GFP_Phall_Rhod_Kettin_488_9.czi_intensities.txt	11	2.0	1.1783530637823891	2.2600647521194337
Obs_GFP_Phall_Rhod_Kettin_488_9.czi_intensities.txt	12	2.0	1.141004459131159	2.857455764981761
Obs_GFP_Phall_Rhod_Kettin_488_9.czi_intensities.txt	13	2.0	1.137285856980483	3.3441873027908713
Obs_GFP_Phall_Rhod_Kettin_488_9.czi_intensities.txt	14	2.0	1.1166800212792374	3.950124842542662
Obs_GFP_Phall_Rhod_Kettin_488_9.czi_intensities.txt	15	2.0	1.120752521805911	3.7403399087357285
Obs_GFP_Phall_Rhod_Kettin_488_9.czi_intensities.txt	16	2.0	1.1221305035031357	5.251408928781169
Obs_GFP_Phall_Rhod_Kettin_488_9.czi_intensities.txt	17	2.0	1.1265875423862848	5.122948903659257
Obs_GFP_Phall_Rhod_Kettin_488_9.czi_intensities.txt	18	2.0	1.1761062237702937	3.4810564477053823
Obs_GFP_Phall_Rhod_Kettin_488_9.czi_intensities.txt	19	2.0	1.2214591525614915	4.319077909102272
Obs_GFP_Phall_Rhod_Kettin_488_9.czi_intensities.txt	20	2.0	1.1617489784379877	3.3154252669720394
Obs_GFP_Phall_Rhod_Kettin_488_9.czi_intensities.txt	21	2.0	1.1053091517289049	3.3914349161980537
Obs_GFP_Phall_Rhod_Kettin_488_9.czi_intensities.txt	22	2.0	1.1248203198154467	3.447403262056825
Obs_GFP_Phall_Rhod_Kettin_488_9.czi_intensities.txt	23	3.0	1.0322042619744471	3.9187444450683597
Obs_GFP_Phall_Rhod_Kettin_488_9.czi_intensities.txt	24	3.0	1.0014871336781221	2.719668996836889
Obs_GFP_Phall_Rhod_Kettin_488_9.czi_intensities.txt	25	3.0	1.0445217289623474	2.355684407631065
Obs_GFP_Phall_Rhod_Kettin_488_9.czi_intensities.txt	26	3.0	0.9935279893649726	1.9020782806309946
Obs_GFP_Phall_Rhod_Kettin_488_9.czi_intensities.txt	27	3.0	0.9353533247828374	3.175845550297579
Obs_GFP_Phall_Rhod_Kettin_488_9.czi_intensities.txt	28	3.0	1.0669517227703809	3.59077368828021
Obs_GFP_Phall_Rhod_Kettin_488_9.czi_intensities.txt	29	3.0	0.9768651387859016	3.3615494848245775
Obs_GFP_Phall_Rhod_Kettin_488_9.czi_intensities.txt	30	3.0	1.050961850372025	3.0794397733828194
Obs_GFP_Phall_Rhod_Kettin_488_9.czi_intensities.txt	31	3.0	1.0672943488084272	3.6456793486137893
Obs_GFP_Phall_Rhod_Kettin_488_9.czi_intensities.txt	32	4.0	0.8368817275889514	2.9565549106394355
Obs_GFP_Phall_Rhod_Kettin_488_9.czi_intensities.txt	33	4.0	1.0266664261464196	2.4199058454070186
Obs_GFP_Phall_Rhod_Kettin_488_9.czi_intensities.txt	34	4.0	0.9784218765328181	3.104946229104997
Obs_GFP_Phall_Rhod_Kettin_488_9.czi_intensities.txt	35	5.0	0.9182337646580017	1.6588513202168953
Obs_GFP_Phall_Rhod_Kettin_488_9.czi_intensities.txt	36	5.0	1.0042790221338596	2.1833401744081886
Obs_GFP_Phall_Rhod_Kettin_488_9.czi_intensities.txt	37	5.0	0.9985537223976761	2.4383976703903074
Obs_GFP_Phall_Rhod_Kettin_488_9.czi_intensities.txt	38	5.0	0.8528964168087568	2.5073407668609704
Obs_GFP_Phall_Rhod_Kettin_488_9.czi_intensities.txt	39	5.0	0.8453913210221708	2.165836170924032
Obs_GFP_Phall_Rhod_Kettin_488_9.czi_intensities.txt	40	6.0	0.7710745404658549	1.3332497632618476
Obs_GFP_Phall_Rhod_Kettin_488_9.czi_intensities.txt	41	6.0	0.7825744758495976	1.3222443222950855
Obs_GFP_Phall_Rhod_Kettin_488_9.czi_intensities.txt	42	6.0	0.847421602760373	1.8744326680138088
Obs_GFP_Phall_Rhod_Kettin_488_9.czi_intensities.txt	43	6.0	0.7598823945597734	1.5460526286827012
Obs_GFP_Phall_Rhod_Kettin_488_9.czi_intensities.txt	44	6.0	0.807430593004532	2.1741164742443395
Obs_GFP_Phall_Rhod_Kettin_488_9.czi_intensities.txt	45	7.0	0.6269702477035363	2.640875426556952
Obs_GFP_Phall_Rhod_Kettin_488_9.czi_intensities.txt	46	7.0	0.7552796067564915	1.403922571458808
Obs_GFP_Phall_Rhod_Kettin_488_9.czi_intensities.txt	47	7.0	0.7340295662427051	1.577243110503712
Obs_GFP_Phall_Rhod_Kettin_488_9.czi_intensities.txt	48	7.0	0.7065719421962057	1.1077499026703188
Obs_GFP_Phall_Rhod_Kettin_488_9.czi_intensities.txt	49	7.0	0.7357538906137944	1.2422408033135832
Obs_GFP_Phall_Rhod_Kettin_488_9.czi_intensities.txt	50	7.0	0.7570812292025838	1.6184808965250117
Obs_GFP_Phall_Rhod_Kettin_488_9.czi_intensities.txt	51	7.0	0.7391281887963748	1.3587705830764847
Obs_GFP_Phall_Rhod_Kettin_488_9.czi_intensities.txt	52	7.0	0.7860898744806881	1.4267948120839127
Obs_GFP_Phall_Rhod_Kettin_488_9.czi_intensities.txt	53	7.0	0.7546359250368133	1.9832321291274402
Obs_GFP_Phall_Rhod_Kettin_488_9.czi_intensities.txt	54	8.0	0.6847668023634992	1.3059334049522962
Obs_GFP_Phall_Rhod_Kettin_488_9.czi_intensities.txt	55	8.0	0.7228718551296897	0.9189769662574633
Obs_GFP_Phall_Rhod_Kettin_488_9.czi_intensities.txt	56	8.0	0.7188950249763238	1.353149674221985
Obs_GFP_Phall_Rhod_Kettin_488_9.czi_intensities.txt	57	8.0	0.7092900294338441	1.150516748312253
Obs_GFP_Phall_Rhod_Kettin_488_9.czi_intensities.txt	58	8.0	0.7305458768615245	1.6568238449603399
Obs_GFP_Phall_Rhod_Kettin_488_9.czi_intensities.txt	59	8.0	0.7089898212785025	2.2347781478147737
Obs_GFP_Phall_Rhod_Kettin_488_9.czi_intensities.txt	60	9.0	0.6445353683821834	0.9195944691906384
Obs_GFP_Phall_Rhod_Kettin_488_9.czi_intensities.txt	61	9.0	0.6437495971979256	1.0167525162470237
Obs_GFP_Phall_Rhod_Kettin_488_9.czi_intensities.txt	62	9.0	0.7073076402233877	0.8352239728207587
Obs_GFP_Phall_Rhod_Kettin_488_9.czi_intensities.txt	63	9.0	0.6225970679851273	1.126377056574865
Obs_GFP_Phall_Rhod_Kettin_488_9.czi_intensities.txt	64	10.0	0.6174287443263586	0.8090192947925217
Obs_GFP_Phall_Rhod_Kettin_488_9.czi_intensities.txt	65	10.0	0.6223107244153957	0.9358453246987919
Obs_GFP_Phall_Rhod_Kettin_488_9.czi_intensities.txt	66	10.0	0.5958378059977442	0.6863334731380754
Obs_GFP_Phall_Rhod_Kettin_488_9.czi_intensities.txt	67	11.0	0.5867785157056253	1.0759460706651633
Obs_GFP_Phall_Rhod_Kettin_488_9.czi_intensities.txt	68	11.0	0.5914763664441802	0.6516593805519986
Obs_GFP_Phall_Rhod_Kettin_488_9.czi_intensities.txt	69	11.0	0.6083746717743329	0.6734398692629091
Obs_GFP_Phall_Rhod_Kettin_488_9.czi_intensities.txt	70	11.0	0.6104910647970403	0.6140859023900768
Obs_GFP_Phall_Rhod_Kettin_488_9.czi_intensities.txt	71	11.0	0.6528050821103573	0.5694810473618505
Obs_GFP_Phall_Rhod_Kettin_488_9.czi_intensities.txt	72	11.0	0.6299716013014058	0.8968284509984683
Obs_GFP_Phall_Rhod_Kettin_488_9.czi_intensities.txt	73	11.0	0.6729711334959514	1.0476881549178925
Obs_GFP_Phall_Rhod_Kettin_488_9.czi_intensities.txt	74	12.0	0.5076948668299377	0.9209297657806833
Obs_GFP_Phall_Rhod_Kettin_488_9.czi_intensities.txt	75	12.0	0.5636431676702539	0.5554004352298114
Obs_GFP_Phall_Rhod_Kettin_488_9.czi_intensities.txt	76	12.0	0.5616872925445499	0.6591889398263806
Obs_GFP_Phall_Rhod_Kettin_488_9.czi_intensities.txt	77	12.0	0.49306420417421537	0.5276324038908385
Obs_GFP_Phall_Rhod_Kettin_488_9.czi_intensities.txt	78	12.0	0.5405564858797193	0.673706232017834
Obs_GFP_Phall_Rhod_Kettin_488_9.czi_intensities.txt	79	12.0	0.5777414679239263	0.805257278876289
Obs_GFP_Phall_Rhod_Kettin_488_9.czi_intensities.txt	80	13.0	0.5551643009449273	0.5339413603061142
Obs_GFP_Phall_Rhod_Kettin_488_9.czi_intensities.txt	81	13.0	0.5296656039212126	0.6468306848554255
Obs_GFP_Phall_Rhod_Kettin_488_9.czi_intensities.txt	82	13.0	0.5440578104774548	0.4933452111087609
Obs_GFP_Phall_Rhod_Kettin_488_9.czi_intensities.txt	83	14.0	0.5220715928689507	0.4099090336772697
Obs_GFP_Phall_Rhod_Kettin_488_9.czi_intensities.txt	84	14.0	0.506619259206605	0.3518780707090064
Obs_GFP_Phall_Rhod_Kettin_488_9.czi_intensities.txt	85	14.0	0.6369323660760701	0.4935738769190642
Obs_GFP_Phall_Rhod_Nano2_488_3.czi_intensities.txt	1	1.0	1.012877899866489	4.59337964423971
Obs_GFP_Phall_Rhod_Nano2_488_3.czi_intensities.txt	2	1.0	1.1104174918834444	4.288239848881433
Obs_GFP_Phall_Rhod_Nano2_488_3.czi_intensities.txt	3	1.0	1.0438614583061288	4.630096823007483
Obs_GFP_Phall_Rhod_Nano2_488_3.czi_intensities.txt	4	1.0	1.0609594036486294	4.5786622366271255
Obs_GFP_Phall_Rhod_Nano2_488_3.czi_intensities.txt	5	1.0	1.0980097405715448	4.437170280020895
Obs_GFP_Phall_Rhod_Nano2_488_3.czi_intensities.txt	6	1.0	1.063428608967385	4.473351469559871
Obs_GFP_Phall_Rhod_Nano2_488_3.czi_intensities.txt	7	2.0	0.9251780975728887	4.413693270175568
Obs_GFP_Phall_Rhod_Nano2_488_3.czi_intensities.txt	8	2.0	1.0188568903991244	4.310952681712573
Obs_GFP_Phall_Rhod_Nano2_488_3.czi_intensities.txt	9	2.0	0.974238401151299	4.373981655971397
Obs_GFP_Phall_Rhod_Nano2_488_3.czi_intensities.txt	10	2.0	0.8247294620614364	4.291503812004069
Obs_GFP_Phall_Rhod_Nano2_488_3.czi_intensities.txt	11	2.0	0.941631257890036	4.3997216544728825
Obs_GFP_Phall_Rhod_Nano2_488_3.czi_intensities.txt	12	2.0	0.9280994992634534	4.247743558273404
Obs_GFP_Phall_Rhod_Nano2_488_3.czi_intensities.txt	13	2.0	0.9224380670639837	4.129918732308235
Obs_GFP_Phall_Rhod_Nano2_488_3.czi_intensities.txt	14	2.0	0.9763630898053958	4.240824697559376
Obs_GFP_Phall_Rhod_Nano2_488_3.czi_intensities.txt	15	2.0	1.0342926380901176	4.423400033747808
Obs_GFP_Phall_Rhod_Nano2_488_3.czi_intensities.txt	16	2.0	1.0353454893948313	4.368578534939248
Obs_GFP_Phall_Rhod_Nano2_488_3.czi_intensities.txt	17	3.0	0.6892145075524544	3.9013449041317534
Obs_GFP_Phall_Rhod_Nano2_488_3.czi_intensities.txt	18	3.0	0.8876729180869642	3.909756554147719
Obs_GFP_Phall_Rhod_Nano2_488_3.czi_intensities.txt	19	3.0	0.8259635700968232	4.073789610627946
Obs_GFP_Phall_Rhod_Nano2_488_3.czi_intensities.txt	20	3.0	0.8689562371509644	4.218176067273683
Obs_GFP_Phall_Rhod_Nano2_488_3.czi_intensities.txt	21	3.0	0.8852268850457661	4.191607868560904
Obs_GFP_Phall_Rhod_Nano2_488_3.czi_intensities.txt	22	3.0	0.9265898477559759	4.25686836152956
Obs_GFP_Phall_Rhod_Nano2_488_3.czi_intensities.txt	23	4.0	0.6826973503924157	3.7869973941287314
Obs_GFP_Phall_Rhod_Nano2_488_3.czi_intensities.txt	24	4.0	0.8410281307170901	3.5727171660882173
Obs_GFP_Phall_Rhod_Nano2_488_3.czi_intensities.txt	25	5.0	0.6970756769078867	3.5052800413126546
Obs_GFP_Phall_Rhod_Nano2_488_3.czi_intensities.txt	26	5.0	0.7320765106087388	3.82137595069724
Obs_GFP_Phall_Rhod_Nano2_488_3.czi_intensities.txt	27	5.0	0.7214271233921451	3.3998404111287206
Obs_GFP_Phall_Rhod_Nano2_488_3.czi_intensities.txt	28	6.0	0.79578678180616	3.031843994981138
Obs_GFP_Phall_Rhod_Nano2_488_3.czi_intensities.txt	29	6.0	0.5706515790429618	3.4453460134697056
Obs_GFP_Phall_Rhod_Nano2_488_3.czi_intensities.txt	30	6.0	0.6923670141436541	3.802292097721683
Obs_GFP_Phall_Rhod_Nano2_488_3.czi_intensities.txt	31	6.0	0.7467349910329045	3.7109090719862245
Obs_GFP_Phall_Rhod_Nano2_488_3.czi_intensities.txt	32	7.0	0.6083129003369251	3.4963558523546703
Obs_GFP_Phall_Rhod_Nano2_488_3.czi_intensities.txt	33	7.0	0.6681258820137828	3.438020253192085
Obs_GFP_Phall_Rhod_Nano2_488_3.czi_intensities.txt	34	7.0	0.6376073713234989	3.1287073126924647
Obs_GFP_Phall_Rhod_Nano2_488_3.czi_intensities.txt	35	7.0	0.6251490035236076	3.287043653242104
Obs_GFP_Phall_Rhod_Nano2_488_3.czi_intensities.txt	36	7.0	0.6507163696414484	3.486678713672304
Obs_GFP_Phall_Rhod_Nano2_488_3.czi_intensities.txt	37	7.0	0.5951513548853975	3.6126533897783717
Obs_GFP_Phall_Rhod_Nano2_488_3.czi_intensities.txt	38	7.0	0.6569583299951258	3.404287554961735
Obs_GFP_Phall_Rhod_Nano2_488_3.czi_intensities.txt	39	7.0	0.7750565471377248	3.5146147868773965
Obs_GFP_Phall_Rhod_Nano2_488_3.czi_intensities.txt	40	8.0	0.5302852438952232	3.2954721218969647
Obs_GFP_Phall_Rhod_Nano2_488_3.czi_intensities.txt	41	8.0	0.5715000865320576	3.259804568000631
Obs_GFP_Phall_Rhod_Nano2_488_3.czi_intensities.txt	42	8.0	0.5505285623153526	3.32051668974955
Obs_GFP_Phall_Rhod_Nano2_488_3.czi_intensities.txt	43	8.0	0.48677705868080445	3.2317307316997663
Obs_GFP_Phall_Rhod_Nano2_488_3.czi_intensities.txt	44	8.0	0.5382634826869758	3.228128541480609
Obs_GFP_Phall_Rhod_Nano2_488_3.czi_intensities.txt	45	8.0	0.6883516630934202	3.225434589966121
Obs_GFP_Phall_Rhod_Nano2_488_3.czi_intensities.txt	46	9.0	0.6048956634196273	3.096203495430611
Obs_GFP_Phall_Rhod_Nano2_488_3.czi_intensities.txt	47	9.0	0.5541086447322519	2.8928995177854624
Obs_GFP_Phall_Rhod_Nano2_488_3.czi_intensities.txt	48	9.0	0.621396688112804	3.0678692160407364
Obs_GFP_Phall_Rhod_Nano2_488_3.czi_intensities.txt	49	9.0	0.5766792963649133	3.1219352235805804
Obs_GFP_Phall_Rhod_Nano2_488_3.czi_intensities.txt	50	10.0	0.4762031032782357	2.8313465989506446
Obs_GFP_Phall_Rhod_Nano2_488_3.czi_intensities.txt	51	10.0	0.5323146023160454	2.8020313217991686
Obs_GFP_Phall_Rhod_Nano2_488_3.czi_intensities.txt	52	10.0	0.5930896388803693	2.584781064076895
Obs_GFP_Phall_Rhod_Nano2_488_3.czi_intensities.txt	53	10.0	0.5044169500328495	2.9622783874966108
Obs_GFP_Phall_Rhod_Nano2_488_3.czi_intensities.txt	54	10.0	0.6192670511262764	2.8106520897702487
Obs_GFP_Phall_Rhod_Nano2_488_3.czi_intensities.txt	55	11.0	0.46907796152038067	2.664520893714579
Obs_GFP_Phall_Rhod_Nano2_488_3.czi_intensities.txt	56	11.0	0.42287391015352743	2.721947994461086
Obs_GFP_Phall_Rhod_Nano2_488_3.czi_intensities.txt	57	11.0	0.46371225247546666	2.838643161553945
Obs_GFP_Phall_Rhod_Nano2_488_3.czi_intensities.txt	58	11.0	0.4442796501704847	2.8565193110175375
Obs_GFP_Phall_Rhod_Nano2_488_3.czi_intensities.txt	59	11.0	0.6506300216468333	2.680990426340322
Obs_GFP_Phall_Rhod_Nano2_488_3.czi_intensities.txt	60	12.0	0.5610711119057703	2.548444265957433
Obs_GFP_Phall_Rhod_Nano2_488_3.czi_intensities.txt	61	12.0	0.4285730869113279	2.7261405412595696
Obs_GFP_Phall_Rhod_Nano2_488_3.czi_intensities.txt	62	12.0	0.4591600920685373	2.70841895651809
Obs_GFP_Phall_Rhod_Nano2_488_3.czi_intensities.txt	63	12.0	0.4842284855942732	2.9684907641785614
Obs_GFP_Phall_Rhod_Nano2_488_3.czi_intensities.txt	64	12.0	0.5736470326332408	2.73323520545221
Obs_GFP_Phall_Rhod_Nano2_488_4.czi_intensities.txt	1	0.0	1.015651107644166	4.373461015024348
Obs_GFP_Phall_Rhod_Nano2_488_4.czi_intensities.txt	2	0.0	1.1920665615518822	4.445378614497518
Obs_GFP_Phall_Rhod_Nano2_488_4.czi_intensities.txt	3	1.0	1.0305686467708712	4.163393248810062
Obs_GFP_Phall_Rhod_Nano2_488_4.czi_intensities.txt	4	1.0	1.0419654321620067	4.622312767394466
Obs_GFP_Phall_Rhod_Nano2_488_4.czi_intensities.txt	5	1.0	1.081713099858099	4.585587656227065
Obs_GFP_Phall_Rhod_Nano2_488_4.czi_intensities.txt	6	1.0	1.0725108144896207	4.569048813188846
Obs_GFP_Phall_Rhod_Nano2_488_4.czi_intensities.txt	7	1.0	1.0931720911353913	4.5040539612923425
Obs_GFP_Phall_Rhod_Nano2_488_4.czi_intensities.txt	8	1.0	1.1030698406050727	4.536818548168584
Obs_GFP_Phall_Rhod_Nano2_488_4.czi_intensities.txt	9	2.0	0.9045487022892725	4.3517108239793325
Obs_GFP_Phall_Rhod_Nano2_488_4.czi_intensities.txt	10	2.0	1.0243020894094776	4.317602983945128
Obs_GFP_Phall_Rhod_Nano2_488_4.czi_intensities.txt	11	2.0	0.979530789288734	4.425936962478515
Obs_GFP_Phall_Rhod_Nano2_488_4.czi_intensities.txt	12	2.0	0.9206283898095833	4.13665072594779
Obs_GFP_Phall_Rhod_Nano2_488_4.czi_intensities.txt	13	2.0	0.974964455301144	4.238088984801364
Obs_GFP_Phall_Rhod_Nano2_488_4.czi_intensities.txt	14	2.0	1.0346726474518557	4.371353531195876
Obs_GFP_Phall_Rhod_Nano2_488_4.czi_intensities.txt	15	3.0	0.6942717888612139	3.924769488099921
Obs_GFP_Phall_Rhod_Nano2_488_4.czi_intensities.txt	16	3.0	0.9087738156337464	3.9018579973781775
Obs_GFP_Phall_Rhod_Nano2_488_4.czi_intensities.txt	17	3.0	0.8304481897061408	4.0257117566548875
Obs_GFP_Phall_Rhod_Nano2_488_4.czi_intensities.txt	18	3.0	0.8513943843908558	4.1406540415635185
Obs_GFP_Phall_Rhod_Nano2_488_4.czi_intensities.txt	19	3.0	0.7851688136472148	4.119829716958858
Obs_GFP_Phall_Rhod_Nano2_488_4.czi_intensities.txt	20	3.0	0.9102119740704141	4.181669178372851
Obs_GFP_Phall_Rhod_Nano2_488_4.czi_intensities.txt	21	3.0	0.9258010483722516	4.267108448740925
Obs_GFP_Phall_Rhod_Nano2_488_4.czi_intensities.txt	22	4.0	0.6865480250846598	3.810366507436796
Obs_GFP_Phall_Rhod_Nano2_488_4.czi_intensities.txt	23	4.0	0.6848934898207576	3.990086581780355
Obs_GFP_Phall_Rhod_Nano2_488_4.czi_intensities.txt	24	4.0	0.8459751686910638	3.582241866035411
Obs_GFP_Phall_Rhod_Nano2_488_4.czi_intensities.txt	25	5.0	0.6876243245642978	3.5438737091266606
Obs_GFP_Phall_Rhod_Nano2_488_4.czi_intensities.txt	26	5.0	0.7090026282436962	3.838805966837223
Obs_GFP_Phall_Rhod_Nano2_488_4.czi_intensities.txt	27	5.0	0.7522689878524617	3.5453859822090252
Obs_GFP_Phall_Rhod_Nano2_488_4.czi_intensities.txt	28	6.0	0.8011210226686064	3.1519939231708984
Obs_GFP_Phall_Rhod_Nano2_488_4.czi_intensities.txt	29	6.0	0.5701527552614573	3.395224292160163
Obs_GFP_Phall_Rhod_Nano2_488_4.czi_intensities.txt	30	6.0	0.6583329087060169	3.0581514791709035
Obs_GFP_Phall_Rhod_Nano2_488_4.czi_intensities.txt	31	6.0	0.7107136408842353	3.7699502389289874
Obs_GFP_Phall_Rhod_Nano2_488_4.czi_intensities.txt	32	6.0	0.759612050132779	3.6379943770850494
Obs_GFP_Phall_Rhod_Nano2_488_4.czi_intensities.txt	33	7.0	0.6665253884919586	3.434020069335274
Obs_GFP_Phall_Rhod_Nano2_488_4.czi_intensities.txt	34	7.0	0.6385906908200788	3.1748883002625274
Obs_GFP_Phall_Rhod_Nano2_488_4.czi_intensities.txt	35	7.0	0.6347688400562929	3.2736687090934087
Obs_GFP_Phall_Rhod_Nano2_488_4.czi_intensities.txt	36	7.0	0.654805386327518	3.4864591161028096
Obs_GFP_Phall_Rhod_Nano2_488_4.czi_intensities.txt	37	7.0	0.6033605046966398	3.621376607297065
Obs_GFP_Phall_Rhod_Nano2_488_4.czi_intensities.txt	38	7.0	0.6836679566350589	3.42259640029994
Obs_GFP_Phall_Rhod_Nano2_488_4.czi_intensities.txt	39	8.0	0.5220567294266519	3.292608239698992
Obs_GFP_Phall_Rhod_Nano2_488_4.czi_intensities.txt	40	8.0	0.579025876752457	3.2936959349909944
Obs_GFP_Phall_Rhod_Nano2_488_4.czi_intensities.txt	41	8.0	0.5517987012026941	3.3215743505644952
Obs_GFP_Phall_Rhod_Nano2_488_4.czi_intensities.txt	42	8.0	0.5452463543378894	3.2107216999313737
Obs_GFP_Phall_Rhod_Nano2_488_4.czi_intensities.txt	43	8.0	0.7099927369012361	3.2723602129192844
Obs_GFP_Phall_Rhod_Nano2_488_4.czi_intensities.txt	44	9.0	0.6034187758925887	3.0912397423119224
Obs_GFP_Phall_Rhod_Nano2_488_4.czi_intensities.txt	45	9.0	0.5658789511090778	2.899447601780253
Obs_GFP_Phall_Rhod_Nano2_488_4.czi_intensities.txt	46	9.0	0.6215562108988538	3.072192620380861
Obs_GFP_Phall_Rhod_Nano2_488_4.czi_intensities.txt	47	10.0	0.49970425655362904	2.8909889055349005
Obs_GFP_Phall_Rhod_Nano2_488_4.czi_intensities.txt	48	10.0	0.5389331966048136	2.8287823118059245
Obs_GFP_Phall_Rhod_Nano2_488_4.czi_intensities.txt	49	10.0	0.6065866897167429	2.993250074395176
Obs_GFP_Phall_Rhod_Nano2_488_4.czi_intensities.txt	50	10.0	0.4912154938364794	3.04455700649551
Obs_GFP_Phall_Rhod_Nano2_488_4.czi_intensities.txt	51	10.0	0.541607227237916	2.7053228221691112
Obs_GFP_Phall_Rhod_Nano2_488_4.czi_intensities.txt	52	11.0	0.4697098663351715	2.636590953098665
Obs_GFP_Phall_Rhod_Nano2_488_4.czi_intensities.txt	53	11.0	0.4634183541892706	2.818099121071793
Obs_GFP_Phall_Rhod_Nano2_488_4.czi_intensities.txt	54	11.0	0.6277455510693494	2.7359547120456864
Obs_GFP_Phall_Rhod_Nano2_488_4.czi_intensities.txt	55	12.5	0.5943943194424354	1.8270185008542248
Obs_GFP_Phall_Rhod_Nano2_488_4.czi_intensities.txt	56	12.5	0.40207940916594886	1.6250773513848145
Obs_GFP_Phall_Rhod_Nano2_488_4.czi_intensities.txt	57	12.5	0.4898680895674352	1.7526506239100794
Obs_GFP_Phall_Rhod_Nano2_488_4.czi_intensities.txt	58	12.5	0.3076698765732329	1.8566861635311287
Obs_GFP_Phall_Rhod_Nano2_488_4.czi_intensities.txt	59	12.5	0.24599708176736945	1.7797767149522599
Obs_GFP_Phall_Rhod_Nano2_488_4.czi_intensities.txt	60	12.5	0.24295904461019516	1.7127287821438686
Obs_GFP_Phall_Rhod_Nano2_488_4.czi_intensities.txt	61	13.5	0.5599512238964416	1.7202997950210508
Obs_GFP_Phall_Rhod_Nano2_488_4.czi_intensities.txt	62	13.5	0.33960843992101786	1.3799231173369377
Obs_GFP_Phall_Rhod_Nano2_488_4.czi_intensities.txt	63	13.5	0.2090801475701356	1.5915710919145813
Obs_GFP_Phall_Rhod_Nano2_488_4.czi_intensities.txt	64	13.5	0.6956399849703285	1.4820105547623212
Obs_GFP_Phall_Rhod_Nano2_488_4.czi_intensities.txt	65	13.5	0.4969192934944711	1.5214550488076013
Obs_GFP_Phall_Rhod_Nano2_488_4.czi_intensities.txt	66	14.5	0.4603235053620243	1.4434113995585722
Obs_GFP_Phall_Rhod_Nano2_488_4.czi_intensities.txt	68	14.5	0.2722654591119181	1.1715110151611516
Obs_GFP_Phall_Rhod_Nano2_488_6.czi_intensities.txt	1	2.0	1.1066885712134118	4.664116929488116
Obs_GFP_Phall_Rhod_Nano2_488_6.czi_intensities.txt	2	2.0	1.194329574245286	4.553766968383672
Obs_GFP_Phall_Rhod_Nano2_488_6.czi_intensities.txt	3	2.0	1.1456586236967508	4.528209895761046
Obs_GFP_Phall_Rhod_Nano2_488_6.czi_intensities.txt	4	2.0	1.1747007657709967	4.733520574149989
Obs_GFP_Phall_Rhod_Nano2_488_6.czi_intensities.txt	5	2.0	1.1924882992003485	4.873189740106611
Obs_GFP_Phall_Rhod_Nano2_488_6.czi_intensities.txt	6	2.0	1.2139322825702528	4.760681099326896
Obs_GFP_Phall_Rhod_Nano2_488_6.czi_intensities.txt	7	2.0	1.184403865840032	4.7795004859724886
Obs_GFP_Phall_Rhod_Nano2_488_6.czi_intensities.txt	8	2.0	1.2628009470922628	4.656497554711504
Obs_GFP_Phall_Rhod_Nano2_488_6.czi_intensities.txt	9	3.0	0.9896392353181127	4.207433812422236
Obs_GFP_Phall_Rhod_Nano2_488_6.czi_intensities.txt	10	3.0	1.219398988730035	4.044462265315582
Obs_GFP_Phall_Rhod_Nano2_488_6.czi_intensities.txt	11	3.0	0.9424414389981461	4.036672043596726
Obs_GFP_Phall_Rhod_Nano2_488_6.czi_intensities.txt	12	3.0	1.043511417256282	4.534214312565485
Obs_GFP_Phall_Rhod_Nano2_488_6.czi_intensities.txt	13	3.0	1.0332531632318227	4.535548819631046
Obs_GFP_Phall_Rhod_Nano2_488_6.czi_intensities.txt	14	3.0	1.0882939792078787	4.44892386611718
Obs_GFP_Phall_Rhod_Nano2_488_6.czi_intensities.txt	15	3.0	1.0748622514870454	4.5662880170960145
Obs_GFP_Phall_Rhod_Nano2_488_6.czi_intensities.txt	16	3.0	1.0308231698943906	4.4012133974706
Obs_GFP_Phall_Rhod_Nano2_488_6.czi_intensities.txt	17	3.0	1.0976710884356728	4.386340328719525
Obs_GFP_Phall_Rhod_Nano2_488_6.czi_intensities.txt	18	3.0	1.1302837745146421	4.563639134143786
Obs_GFP_Phall_Rhod_Nano2_488_6.czi_intensities.txt	19	4.0	0.9190359247116473	4.207523373562818
Obs_GFP_Phall_Rhod_Nano2_488_6.czi_intensities.txt	20	4.0	1.06416775531916	4.302040521050416
Obs_GFP_Phall_Rhod_Nano2_488_6.czi_intensities.txt	21	4.0	0.8819270305148483	3.901033088119212
Obs_GFP_Phall_Rhod_Nano2_488_6.czi_intensities.txt	22	5.0	0.9474544367876463	3.683670583992591
Obs_GFP_Phall_Rhod_Nano2_488_6.czi_intensities.txt	23	5.0	1.276959726173936	3.3007814691698916
Obs_GFP_Phall_Rhod_Nano2_488_6.czi_intensities.txt	24	5.0	0.9102250231545581	4.0224156919069936
Obs_GFP_Phall_Rhod_Nano2_488_6.czi_intensities.txt	25	6.0	0.8422570658203723	3.7526226834855034
Obs_GFP_Phall_Rhod_Nano2_488_6.czi_intensities.txt	26	6.0	0.8372774053134894	3.6324240213761763
Obs_GFP_Phall_Rhod_Nano2_488_6.czi_intensities.txt	27	6.0	0.8580969817121737	3.911078701048582
Obs_GFP_Phall_Rhod_Nano2_488_6.czi_intensities.txt	28	6.0	0.8293566470218263	3.941362940629007
Obs_GFP_Phall_Rhod_Nano2_488_6.czi_intensities.txt	29	6.0	0.8610953521465613	3.8696934778442102
Obs_GFP_Phall_Rhod_Nano2_488_6.czi_intensities.txt	30	7.0	0.6877541554149842	3.5158191094835227
Obs_GFP_Phall_Rhod_Nano2_488_6.czi_intensities.txt	31	7.0	0.7030454766502617	3.442504859557079
Obs_GFP_Phall_Rhod_Nano2_488_6.czi_intensities.txt	32	7.0	0.8060423485573635	3.6296897623711524
Obs_GFP_Phall_Rhod_Nano2_488_6.czi_intensities.txt	33	7.0	0.7495410783725478	3.6632728566896424
Obs_GFP_Phall_Rhod_Nano2_488_6.czi_intensities.txt	34	7.0	0.7020059475926475	3.6108402472365757
Obs_GFP_Phall_Rhod_Nano2_488_6.czi_intensities.txt	35	7.0	0.8477304733179929	3.660805989391141
Obs_GFP_Phall_Rhod_Nano2_488_6.czi_intensities.txt	36	7.0	0.7942930665594999	3.7261870660851666
Obs_GFP_Phall_Rhod_Nano2_488_6.czi_intensities.txt	37	7.0	0.8205802931513986	3.4665496775192195
Obs_GFP_Phall_Rhod_Nano2_488_6.czi_intensities.txt	38	8.0	0.9840220980115726	3.136012142003948
Obs_GFP_Phall_Rhod_Nano2_488_6.czi_intensities.txt	39	8.0	0.7513159811517751	3.369871638872436
Obs_GFP_Phall_Rhod_Nano2_488_6.czi_intensities.txt	40	8.0	0.7603265116973313	3.7520045482224655
Obs_GFP_Phall_Rhod_Nano2_488_6.czi_intensities.txt	41	8.0	0.7141847841136215	3.6641620799908714
Obs_GFP_Phall_Rhod_Nano2_488_6.czi_intensities.txt	42	8.0	0.7725655169748674	3.7085741751384784
Obs_GFP_Phall_Rhod_Nano2_488_6.czi_intensities.txt	43	9.0	0.7107537153453325	3.330195875782568
Obs_GFP_Phall_Rhod_Nano2_488_6.czi_intensities.txt	44	9.0	0.7155674771227054	3.5922953518376297
Obs_GFP_Phall_Rhod_Nano2_488_6.czi_intensities.txt	45	9.0	0.7328997495632594	3.554087085288489
Obs_GFP_Phall_Rhod_Nano2_488_6.czi_intensities.txt	46	10.0	0.6550500226096542	3.1613586685113058
Obs_GFP_Phall_Rhod_Nano2_488_6.czi_intensities.txt	47	10.0	0.6797222111518696	3.178861291799407
Obs_GFP_Phall_Rhod_Nano2_488_6.czi_intensities.txt	48	10.0	0.657449573954638	3.169422038969344
Obs_GFP_Phall_Rhod_Nano2_488_6.czi_intensities.txt	49	10.0	0.7186785536802504	3.2083334702440727
Obs_GFP_Phall_Rhod_Nano2_488_6.czi_intensities.txt	50	10.0	0.6567420960716568	3.2971127572620813
Obs_GFP_Phall_Rhod_Nano2_488_6.czi_intensities.txt	51	10.0	0.6347637401727428	3.4533354511463705
Obs_GFP_Phall_Rhod_Nano2_488_6.czi_intensities.txt	52	11.0	0.5848828317583387	3.2611086359760826
Obs_GFP_Phall_Rhod_Nano2_488_6.czi_intensities.txt	53	11.0	0.5671676126109273	3.4295233946628767
Obs_GFP_Phall_Rhod_Nano2_488_6.czi_intensities.txt	54	12.0	0.5684886409087544	3.1896515137543204
Obs_GFP_Phall_Rhod_Nano2_488_6.czi_intensities.txt	55	12.0	0.5610681035688114	2.7846569034731377
Obs_GFP_Phall_Rhod_Nano2_488_6.czi_intensities.txt	56	12.0	0.6016406348775754	2.816527794924186
Obs_GFP_Phall_Rhod_Nano2_488_6.czi_intensities.txt	57	13.0	0.542212933239797	3.1194443427819105
Obs_GFP_Phall_Rhod_Nano2_488_6.czi_intensities.txt	58	13.0	0.5315943551283622	3.185747394671863
Obs_GFP_Phall_Rhod_Nano2_488_6.czi_intensities.txt	59	13.0	0.5154897611150426	2.738585104356725
Obs_GFP_Phall_Rhod_Nano2_488_6.czi_intensities.txt	60	13.0	0.6418475710284145	2.8206334722713673
Obs_GFP_Phall_Rhod_Nano2_488_6.czi_intensities.txt	61	13.0	0.6388112695285113	2.8344876668521213
Obs_GFP_Phall_Rhod_Nano2_488_6.czi_intensities.txt	62	13.0	0.6048416618855843	2.965320188911472
Obs_GFP_Phall_Rhod_Nano2_488_6.czi_intensities.txt	63	14.0	0.5731458569836141	2.6747242046296873
Obs_GFP_Phall_Rhod_Nano2_488_6.czi_intensities.txt	64	14.0	0.45757607103396264	2.780047643286739
Obs_GFP_Phall_Rhod_Nano2_488_6.czi_intensities.txt	65	14.0	0.5201383798706838	2.85661593680689
Obs_GFP_Phall_Rhod_Nano2_488_6.czi_intensities.txt	66	14.0	0.521255456275367	3.060161165526818
Obs_GFP_Phall_Rhod_Nano2_488_6.czi_intensities.txt	67	15.0	0.5113957537305696	2.4923973237074732
Obs_GFP_Phall_Rhod_Nano2_488_6.czi_intensities.txt	68	15.0	0.5012765531778328	2.9837273314953308
Obs_GFP_Phall_Rhod_Nano2_488_6.czi_intensities.txt	69	15.0	0.5134843377443498	3.0450834773253326
Obs_GFP_Phall_Rhod_Nano2_488_5.czi_intensities.txt	1	1.0	1.6402223225015036	4.601866916979866
Obs_GFP_Phall_Rhod_Nano2_488_5.czi_intensities.txt	2	1.0	1.62884199854216	6.004188607773322
Obs_GFP_Phall_Rhod_Nano2_488_5.czi_intensities.txt	3	1.0	1.938155520867936	5.122222986989343
Obs_GFP_Phall_Rhod_Nano2_488_5.czi_intensities.txt	4	3.0	1.5440108006295983	4.905303486531047
Obs_GFP_Phall_Rhod_Nano2_488_5.czi_intensities.txt	5	3.0	1.4198748168580733	4.826271177874146
Obs_GFP_Phall_Rhod_Nano2_488_5.czi_intensities.txt	6	3.0	1.4969278204978262	4.879183621998792
Obs_GFP_Phall_Rhod_Nano2_488_5.czi_intensities.txt	7	3.0	1.5802669931703757	4.788614449623176
Obs_GFP_Phall_Rhod_Nano2_488_5.czi_intensities.txt	8	3.0	1.5263026276124192	4.9934882480515
Obs_GFP_Phall_Rhod_Nano2_488_5.czi_intensities.txt	9	3.0	1.5256010722433018	5.107617624016807
Obs_GFP_Phall_Rhod_Nano2_488_5.czi_intensities.txt	10	3.0	1.520040912383244	5.145232686270189
Obs_GFP_Phall_Rhod_Nano2_488_5.czi_intensities.txt	11	3.0	1.4915455177387296	5.043950084421511
Obs_GFP_Phall_Rhod_Nano2_488_5.czi_intensities.txt	12	3.0	1.5352019092464273	4.743078118131359
Obs_GFP_Phall_Rhod_Nano2_488_5.czi_intensities.txt	13	4.0	1.1628934615210094	4.479408164979905
Obs_GFP_Phall_Rhod_Nano2_488_5.czi_intensities.txt	14	4.0	1.2485035171609395	4.5656489789513675
Obs_GFP_Phall_Rhod_Nano2_488_5.czi_intensities.txt	15	4.0	1.2101611176976914	4.328551727965776
Obs_GFP_Phall_Rhod_Nano2_488_5.czi_intensities.txt	16	4.0	1.4134285291270026	3.95664895875859
Obs_GFP_Phall_Rhod_Nano2_488_5.czi_intensities.txt	17	4.0	1.4219837752005215	4.590166751064914
Obs_GFP_Phall_Rhod_Nano2_488_5.czi_intensities.txt	18	4.0	1.2516345172150116	4.3739307043639
Obs_GFP_Phall_Rhod_Nano2_488_5.czi_intensities.txt	19	4.0	1.3812752125740462	4.433962186360458
Obs_GFP_Phall_Rhod_Nano2_488_5.czi_intensities.txt	20	4.0	1.1698467363317775	4.352887167597725
Obs_GFP_Phall_Rhod_Nano2_488_5.czi_intensities.txt	21	4.0	1.2787267011334404	4.3285333118004745
Obs_GFP_Phall_Rhod_Nano2_488_5.czi_intensities.txt	22	5.0	1.1011335022310662	4.40197928343137
Obs_GFP_Phall_Rhod_Nano2_488_5.czi_intensities.txt	23	5.0	1.2722475783817169	4.16949521509343
Obs_GFP_Phall_Rhod_Nano2_488_5.czi_intensities.txt	24	5.0	1.2027396242275017	4.170447713128005
Obs_GFP_Phall_Rhod_Nano2_488_5.czi_intensities.txt	25	6.0	0.8673827813518764	3.8715489205006253
Obs_GFP_Phall_Rhod_Nano2_488_5.czi_intensities.txt	26	6.0	1.0751648340678677	4.291129781141366
Obs_GFP_Phall_Rhod_Nano2_488_5.czi_intensities.txt	27	6.0	1.067471017976329	4.042462494978558
Obs_GFP_Phall_Rhod_Nano2_488_5.czi_intensities.txt	28	7.0	1.0470020634610606	3.5705605404685326
Obs_GFP_Phall_Rhod_Nano2_488_5.czi_intensities.txt	29	7.0	0.8310387895360448	3.820218650568358
Obs_GFP_Phall_Rhod_Nano2_488_5.czi_intensities.txt	30	7.0	1.0474787513711523	3.6966822909871278
Obs_GFP_Phall_Rhod_Nano2_488_5.czi_intensities.txt	31	7.0	0.9422188737876349	3.9171591208293157
Obs_GFP_Phall_Rhod_Nano2_488_5.czi_intensities.txt	32	8.0	0.9391347226020146	3.5585324042980573
Obs_GFP_Phall_Rhod_Nano2_488_5.czi_intensities.txt	33	8.0	0.8907725631225115	3.5705310121047353
Obs_GFP_Phall_Rhod_Nano2_488_5.czi_intensities.txt	34	8.0	1.0721790517735816	3.442509765177571
Obs_GFP_Phall_Rhod_Nano2_488_5.czi_intensities.txt	35	8.0	0.9221995097864807	3.6566500342148442
Obs_GFP_Phall_Rhod_Nano2_488_5.czi_intensities.txt	36	8.0	0.9542127942900902	3.57922680643604
Obs_GFP_Phall_Rhod_Nano2_488_5.czi_intensities.txt	37	8.0	0.8186402818158152	3.8660637245236935
Obs_GFP_Phall_Rhod_Nano2_488_5.czi_intensities.txt	38	9.0	0.7743652587732351	3.322161972990543
Obs_GFP_Phall_Rhod_Nano2_488_5.czi_intensities.txt	39	9.0	0.7589949254877594	3.3110428813915207
Obs_GFP_Phall_Rhod_Nano2_488_5.czi_intensities.txt	40	9.0	0.7465382241073238	3.2292479692412073
Obs_GFP_Phall_Rhod_Nano2_488_5.czi_intensities.txt	41	9.0	0.8744664923141456	3.489110210288006
Obs_GFP_Phall_Rhod_Nano2_488_5.czi_intensities.txt	42	9.0	0.8288679377960585	3.57965198177453
Obs_GFP_Phall_Rhod_Nano2_488_5.czi_intensities.txt	43	9.0	0.8749090058599669	3.6818307862292534
Obs_GFP_Phall_Rhod_Nano2_488_5.czi_intensities.txt	44	9.0	0.8035600451163671	3.355963270779477
Obs_GFP_Phall_Rhod_Nano2_488_5.czi_intensities.txt	45	10.0	0.6997025523369858	3.303199698032444
Obs_GFP_Phall_Rhod_Nano2_488_5.czi_intensities.txt	46	10.0	0.7202138250102148	3.398376405955539
Obs_GFP_Phall_Rhod_Nano2_488_5.czi_intensities.txt	47	10.0	0.6492263418198586	3.1029469790507216
Obs_GFP_Phall_Rhod_Nano2_488_5.czi_intensities.txt	48	10.0	0.6917786241630541	3.2387303983320894
Obs_GFP_Phall_Rhod_Nano2_488_5.czi_intensities.txt	49	10.0	0.7247680171095582	3.396881547702175
Obs_GFP_Phall_Rhod_Nano2_488_5.czi_intensities.txt	50	10.0	0.9052639971943228	3.237212348776412
Obs_GFP_Phall_Rhod_Nano2_488_5.czi_intensities.txt	51	11.0	0.5784198248791915	2.9805756001621355
Obs_GFP_Phall_Rhod_Nano2_488_5.czi_intensities.txt	52	11.0	0.7281310580171569	3.1562407279709
Obs_GFP_Phall_Rhod_Nano2_488_5.czi_intensities.txt	53	11.0	0.7197488857262322	3.3025238990007217
Obs_GFP_Phall_Rhod_Nano2_488_5.czi_intensities.txt	54	12.0	0.6767562676188367	2.880410762837307
Obs_GFP_Phall_Rhod_Nano2_488_5.czi_intensities.txt	55	12.0	0.6794351273336134	3.1329469874643943
Obs_GFP_Phall_Rhod_Nano2_488_5.czi_intensities.txt	56	12.0	0.7178329845021276	3.1885226428396933
Obs_GFP_Phall_Rhod_Nano2_488_5.czi_intensities.txt	57	13.0	0.6269676443650498	2.8530830172474855
Obs_GFP_Phall_Rhod_Nano2_488_5.czi_intensities.txt	58	13.0	0.64248473513645	2.802813348876621
Obs_GFP_Phall_Rhod_Nano2_488_5.czi_intensities.txt	59	13.0	0.6225670449480635	2.7459358074329034
Obs_GFP_Phall_Rhod_Nano2_488_5.czi_intensities.txt	60	13.0	0.5643809687095189	2.823360011155153
Obs_GFP_Phall_Rhod_Nano2_488_5.czi_intensities.txt	61	13.0	0.5991447352887997	3.237175153778267
Obs_GFP_Phall_Rhod_Nano2_488_5.czi_intensities.txt	62	13.0	0.6466497129703141	2.7974183562706605
Obs_GFP_Phall_Rhod_Nano2_488_5.czi_intensities.txt	63	14.0	0.6088459347821751	2.707330905692149
Obs_GFP_Phall_Rhod_Nano2_488_5.czi_intensities.txt	64	14.0	0.5553295203220818	2.870933994188093
Obs_GFP_Phall_Rhod_Nano2_488_5.czi_intensities.txt	65	14.0	0.5805390162309317	2.8416935641751664
Obs_GFP_Phall_Rhod_Nano2_488_5.czi_intensities.txt	66	14.0	0.6641142773140818	2.6470124951956424
Obs_GFP_Phall_Rhod_Nano2_488_5.czi_intensities.txt	67	2.0	1.6711030924977972	5.040525890420323
Obs_GFP_Phall_Rhod_Nano2_488_5.czi_intensities.txt	68	2.0	1.6770415007716712	4.915771330340801
Obs_GFP_Phall_Rhod_Nano2_488_5.czi_intensities.txt	69	2.0	1.7340918190125916	5.13146556421001
Obs_GFP_Phall_Rhod_Nano2_488_5.czi_intensities.txt	70	2.0	1.7004049911057928	5.50907601005989
Obs_GFP_Phall_Rhod_Nano2_488_5.czi_intensities.txt	71	2.0	1.5460355722278096	7.630551611175211
Obs_GFP_Phall_Rhod_Nano2_488_5.czi_intensities.txt	72	2.0	1.7767008031905456	5.397804471440826
Obs_GFP_Phall_Rhod_Nano2_488_5.czi_intensities.txt	73	2.0	1.782247322109766	5.571011584196794
Obs_GFP_Phall_Rhod_Nano2_488_5.czi_intensities.txt	74	2.0	1.7626047875680455	5.186706418050875
Obs_GFP_Phall_Rhod_Nano2_488_8.czi_intensities.txt	1	2.0	1.512000809469011	4.502338872900902
Obs_GFP_Phall_Rhod_Nano2_488_8.czi_intensities.txt	2	2.0	1.5406933894598367	4.556598867339176
Obs_GFP_Phall_Rhod_Nano2_488_8.czi_intensities.txt	3	2.0	1.54709653860187	4.633204398219593
Obs_GFP_Phall_Rhod_Nano2_488_8.czi_intensities.txt	4	2.0	1.5580261619298106	4.691318571915778
Obs_GFP_Phall_Rhod_Nano2_488_8.czi_intensities.txt	5	2.0	1.5158808635962633	4.494289988422566
Obs_GFP_Phall_Rhod_Nano2_488_8.czi_intensities.txt	6	2.0	1.6023474715405654	4.418606112581676
Obs_GFP_Phall_Rhod_Nano2_488_8.czi_intensities.txt	7	3.0	1.4117705869222588	4.512976295972901
Obs_GFP_Phall_Rhod_Nano2_488_8.czi_intensities.txt	8	3.0	1.3611434785205767	4.528054839543496
Obs_GFP_Phall_Rhod_Nano2_488_8.czi_intensities.txt	9	3.0	1.3800913820435246	4.622693433263825
Obs_GFP_Phall_Rhod_Nano2_488_8.czi_intensities.txt	10	3.0	1.3727996802363822	4.216409059076914
Obs_GFP_Phall_Rhod_Nano2_488_8.czi_intensities.txt	11	3.0	1.3426959382255133	4.688940124816801
Obs_GFP_Phall_Rhod_Nano2_488_8.czi_intensities.txt	12	3.0	1.425211070875729	4.37022478285444
Obs_GFP_Phall_Rhod_Nano2_488_8.czi_intensities.txt	13	3.0	1.3824135213277038	4.520861036155246
Obs_GFP_Phall_Rhod_Nano2_488_8.czi_intensities.txt	14	3.0	1.4687792281890726	4.401225099445176
Obs_GFP_Phall_Rhod_Nano2_488_8.czi_intensities.txt	15	3.0	1.4519822764058372	4.399901288264332
Obs_GFP_Phall_Rhod_Nano2_488_8.czi_intensities.txt	16	5.0	0.9760448957432252	4.000137775891208
Obs_GFP_Phall_Rhod_Nano2_488_8.czi_intensities.txt	17	5.0	1.0633015263466217	3.8172230937368536
Obs_GFP_Phall_Rhod_Nano2_488_8.czi_intensities.txt	18	6.0	0.8206188863563713	3.4446213804317973
Obs_GFP_Phall_Rhod_Nano2_488_8.czi_intensities.txt	19	6.0	0.956197583494477	3.772155449293353
Obs_GFP_Phall_Rhod_Nano2_488_8.czi_intensities.txt	20	7.0	0.863924487926089	3.6714570256535177
Obs_GFP_Phall_Rhod_Nano2_488_8.czi_intensities.txt	21	7.0	0.9604273598949915	3.50404884397794
Obs_GFP_Phall_Rhod_Nano2_488_8.czi_intensities.txt	22	7.0	1.0504335247954968	3.702010379959093
Obs_GFP_Phall_Rhod_Nano2_488_8.czi_intensities.txt	23	7.0	0.9270004734793306	3.5991314339649216
Obs_GFP_Phall_Rhod_Nano2_488_8.czi_intensities.txt	24	7.0	0.9704972441197761	3.5327873183728498
Obs_GFP_Phall_Rhod_Nano2_488_8.czi_intensities.txt	25	7.0	1.0079828873488133	3.69007108674444
Obs_GFP_Phall_Rhod_Nano2_488_8.czi_intensities.txt	26	9.0	0.8227026825115251	3.4249543576799697
Obs_GFP_Phall_Rhod_Nano2_488_8.czi_intensities.txt	27	9.0	0.8355957905910011	3.5754538890699306
Obs_GFP_Phall_Rhod_Nano2_488_8.czi_intensities.txt	28	9.0	0.8958712910556035	3.4501220169188698
Obs_GFP_Phall_Rhod_Nano2_488_8.czi_intensities.txt	29	10.0	0.7753296531458648	3.2210379811492675
Obs_GFP_Phall_Rhod_Nano2_488_8.czi_intensities.txt	30	10.0	0.7460864568215974	3.254769337685677
Obs_GFP_Phall_Rhod_Nano2_488_8.czi_intensities.txt	31	10.0	0.7463300688762639	3.332881693330958
Obs_GFP_Phall_Rhod_Nano2_488_8.czi_intensities.txt	32	10.0	0.9131654184826614	3.148637453878788
Obs_GFP_Phall_Rhod_Nano2_488_8.czi_intensities.txt	33	10.0	0.7650759082599394	3.1207565250350706
Obs_GFP_Phall_Rhod_Nano2_488_8.czi_intensities.txt	34	11.0	0.7735584843038663	3.443368380102733
Obs_GFP_Phall_Rhod_Nano2_488_8.czi_intensities.txt	35	11.0	0.7403802965307711	3.2955054572976965
Obs_GFP_Phall_Rhod_Nano2_488_8.czi_intensities.txt	36	11.0	0.6923020889272237	2.9966127747033764
Obs_GFP_Phall_Rhod_Nano2_488_8.czi_intensities.txt	37	12.0	0.7342082810100977	3.1632982360665305
Obs_GFP_Phall_Rhod_Nano2_488_8.czi_intensities.txt	38	12.0	0.6794655230733313	2.9287677701202255
Obs_GFP_Phall_Rhod_Nano2_488_8.czi_intensities.txt	39	12.0	0.6837030355465982	3.0053661016004374
Obs_GFP_Phall_Rhod_Nano2_488_8.czi_intensities.txt	40	12.0	0.7215762377465924	3.0686410495401613
Obs_GFP_Phall_Rhod_Nano2_488_8.czi_intensities.txt	41	13.0	0.6368562769562917	2.998535102786607
Obs_GFP_Phall_Rhod_Nano2_488_8.czi_intensities.txt	42	13.0	0.5556431574506794	2.6986062205748036
Obs_GFP_Phall_Rhod_Nano2_488_8.czi_intensities.txt	43	13.0	0.5619176297741852	2.7603775887459845
Obs_GFP_Phall_Rhod_Nano2_488_8.czi_intensities.txt	44	13.0	0.6299115089204406	3.0894639406455373
Obs_GFP_Phall_Rhod_Nano2_488_8.czi_intensities.txt	45	13.0	0.7041045239154518	3.00706958381026
Obs_GFP_Phall_Rhod_Nano2_488_8.czi_intensities.txt	46	14.0	0.6691210359811658	2.801358374038484
Obs_GFP_Phall_Rhod_Nano2_488_8.czi_intensities.txt	47	14.0	0.599708135772422	2.9950159132948024
Obs_GFP_Phall_Rhod_Nano2_488_8.czi_intensities.txt	48	14.0	0.5565821557296945	2.8534806602157388
Obs_GFP_Phall_Rhod_Nano2_488_8.czi_intensities.txt	49	14.0	0.5912770236131293	2.973503477671392
Obs_GFP_Phall_Rhod_Nano2_488_8.czi_intensities.txt	50	15.0	0.5446987267393262	2.8399394918019354
Obs_GFP_Phall_Rhod_Nano2_488_8.czi_intensities.txt	52	4.0	1.1248997867563817	3.9581874304507356
Obs_GFP_Phall_Rhod_Nano2_488_8.czi_intensities.txt	53	4.0	1.246246427994999	4.358393369128634
Obs_GFP_Phall_Rhod_Nano2_488_8.czi_intensities.txt	54	4.0	1.2173583767347615	4.18306165394977
Obs_GFP_Phall_Rhod_Nano2_488_8.czi_intensities.txt	55	4.0	1.2169209608214062	4.15878256567506
Obs_GFP_Phall_Rhod_Nano2_488_8.czi_intensities.txt	56	4.0	1.2043215194450767	4.133601661573719
Obs_GFP_Phall_Rhod_Nano2_488_8.czi_intensities.txt	57	4.0	1.337636324133122	4.221002510735278
Obs_GFP_Phall_Rhod_Nano2_488_8.czi_intensities.txt	58	4.0	1.2805014235645396	4.111232362394357
Obs_GFP_Phall_Rhod_Nano2_488_8.czi_intensities.txt	59	8.0	0.9059879897984078	3.6812684709859935
Obs_GFP_Phall_Rhod_Nano2_488_8.czi_intensities.txt	60	8.0	0.8862896817417917	3.3755366423307005
Obs_GFP_Phall_Rhod_Nano2_488_8.czi_intensities.txt	61	8.0	0.8689102595053942	3.725445023133317
Obs_GFP_Phall_Rhod_Nano2_488_8.czi_intensities.txt	62	8.0	0.8262880705278756	3.6625091644085646
Obs_GFP_Phall_Rhod_Nano2_488_8.czi_intensities.txt	63	8.0	0.8744232476064588	3.5282621910065974
Obs_GFP_Phall_Rhod_Nano2_488_8.czi_intensities.txt	64	8.0	0.932549857049016	3.6811382545431934
Obs_GFP_Phall_Rhod_Nano2_488_7.czi_intensities.txt	1	2.0	1.4978161072433158	4.484653642988402
Obs_GFP_Phall_Rhod_Nano2_488_7.czi_intensities.txt	2	2.0	1.5688534814630342	4.573337553504129
Obs_GFP_Phall_Rhod_Nano2_488_7.czi_intensities.txt	3	2.0	1.5587831626918633	4.612181811292465
Obs_GFP_Phall_Rhod_Nano2_488_7.czi_intensities.txt	4	2.0	1.5312385188698372	4.6137800036683245
Obs_GFP_Phall_Rhod_Nano2_488_7.czi_intensities.txt	5	2.0	1.5443454759271205	4.499002816507561
Obs_GFP_Phall_Rhod_Nano2_488_7.czi_intensities.txt	6	2.0	1.599462803899231	4.403984351399186
Obs_GFP_Phall_Rhod_Nano2_488_7.czi_intensities.txt	7	3.0	1.4210443456260056	4.318359587861913
Obs_GFP_Phall_Rhod_Nano2_488_7.czi_intensities.txt	8	3.0	1.3602823439646028	4.484982001134137
Obs_GFP_Phall_Rhod_Nano2_488_7.czi_intensities.txt	9	3.0	1.36397866282927	4.4615206913425345
Obs_GFP_Phall_Rhod_Nano2_488_7.czi_intensities.txt	10	3.0	1.4391050858640912	4.587863243408863
Obs_GFP_Phall_Rhod_Nano2_488_7.czi_intensities.txt	11	3.0	1.3343880903787568	4.660069288717368
Obs_GFP_Phall_Rhod_Nano2_488_7.czi_intensities.txt	12	3.0	1.4313920931738142	4.408558887242464
Obs_GFP_Phall_Rhod_Nano2_488_7.czi_intensities.txt	13	3.0	1.3839762435523824	4.522748829540011
Obs_GFP_Phall_Rhod_Nano2_488_7.czi_intensities.txt	14	3.0	1.461247772351443	4.391528532585782
Obs_GFP_Phall_Rhod_Nano2_488_7.czi_intensities.txt	15	3.0	1.4526037790832786	4.4404825459428325
Obs_GFP_Phall_Rhod_Nano2_488_7.czi_intensities.txt	16	4.0	1.1808364971622767	4.350983169616709
Obs_GFP_Phall_Rhod_Nano2_488_7.czi_intensities.txt	17	4.0	1.2261079572093336	4.133583486547663
Obs_GFP_Phall_Rhod_Nano2_488_7.czi_intensities.txt	18	4.0	1.2063026442434452	4.142000542043314
Obs_GFP_Phall_Rhod_Nano2_488_7.czi_intensities.txt	19	4.0	1.2240435012083377	4.135756263268253
Obs_GFP_Phall_Rhod_Nano2_488_7.czi_intensities.txt	20	4.0	1.355062002699877	4.245422739993013
Obs_GFP_Phall_Rhod_Nano2_488_7.czi_intensities.txt	21	4.0	1.2737282708777553	4.148472200517437
Obs_GFP_Phall_Rhod_Nano2_488_7.czi_intensities.txt	22	5.0	0.946800896055765	3.98974206787771
Obs_GFP_Phall_Rhod_Nano2_488_7.czi_intensities.txt	23	5.0	1.0687456737097873	3.931156085652541
Obs_GFP_Phall_Rhod_Nano2_488_7.czi_intensities.txt	24	5.0	1.092400950931936	3.8633839642910743
Obs_GFP_Phall_Rhod_Nano2_488_7.czi_intensities.txt	25	6.0	0.8006286103097799	3.4203572033372214
Obs_GFP_Phall_Rhod_Nano2_488_7.czi_intensities.txt	26	6.0	0.8343593441679205	3.426507097442914
Obs_GFP_Phall_Rhod_Nano2_488_7.czi_intensities.txt	27	6.0	0.9544837008937117	3.792867973178779
Obs_GFP_Phall_Rhod_Nano2_488_7.czi_intensities.txt	28	8.0	0.8656866994332157	3.5188933264343314
Obs_GFP_Phall_Rhod_Nano2_488_7.czi_intensities.txt	29	8.0	0.8561844620696769	3.3621446921969347
Obs_GFP_Phall_Rhod_Nano2_488_7.czi_intensities.txt	30	8.0	0.8600825419065187	3.7130420350202886
Obs_GFP_Phall_Rhod_Nano2_488_7.czi_intensities.txt	31	8.0	0.8326296335650499	3.626234422690994
Obs_GFP_Phall_Rhod_Nano2_488_7.czi_intensities.txt	32	8.0	0.8735891773015848	3.5465808127120395
Obs_GFP_Phall_Rhod_Nano2_488_7.czi_intensities.txt	33	8.0	0.9227086733543883	3.600160619122443
Obs_GFP_Phall_Rhod_Nano2_488_7.czi_intensities.txt	34	9.0	0.8250757178416293	3.3764207857535933
Obs_GFP_Phall_Rhod_Nano2_488_7.czi_intensities.txt	35	9.0	0.7890859964310072	3.2026707896817843
Obs_GFP_Phall_Rhod_Nano2_488_7.czi_intensities.txt	36	9.0	0.8381538258215746	3.585457923968644
Obs_GFP_Phall_Rhod_Nano2_488_7.czi_intensities.txt	37	9.0	0.8819542367741297	3.4164605981716765
Obs_GFP_Phall_Rhod_Nano2_488_7.czi_intensities.txt	38	10.0	0.7855091824676168	3.2221625385424213
Obs_GFP_Phall_Rhod_Nano2_488_7.czi_intensities.txt	39	10.0	0.7385524510870227	3.2268304189203447
Obs_GFP_Phall_Rhod_Nano2_488_7.czi_intensities.txt	40	10.0	0.7442027183636765	3.3219688838049093
Obs_GFP_Phall_Rhod_Nano2_488_7.czi_intensities.txt	41	10.0	0.9234486261512708	3.186499580834781
Obs_GFP_Phall_Rhod_Nano2_488_7.czi_intensities.txt	42	11.0	0.7587457561738827	2.723861761713324
Obs_GFP_Phall_Rhod_Nano2_488_7.czi_intensities.txt	43	11.0	0.7576765091661835	3.4208521199028645
Obs_GFP_Phall_Rhod_Nano2_488_7.czi_intensities.txt	44	11.0	0.7517308772885027	3.3835484835445766
Obs_GFP_Phall_Rhod_Nano2_488_7.czi_intensities.txt	45	12.0	0.7588380074444353	3.2712715312413905
Obs_GFP_Phall_Rhod_Nano2_488_7.czi_intensities.txt	46	12.0	0.6845935407693527	2.902978183898105
Obs_GFP_Phall_Rhod_Nano2_488_7.czi_intensities.txt	47	12.0	0.6772142178788814	2.9841363917071693
Obs_GFP_Phall_Rhod_Nano2_488_7.czi_intensities.txt	48	12.0	0.7164453994415313	3.1031552847632073
Obs_GFP_Phall_Rhod_Nano2_488_7.czi_intensities.txt	49	13.0	0.6405426466565726	3.0111567287381376
Obs_GFP_Phall_Rhod_Nano2_488_7.czi_intensities.txt	50	13.0	0.5570359468822069	2.687405883667599
Obs_GFP_Phall_Rhod_Nano2_488_7.czi_intensities.txt	51	13.0	0.5770797269344783	2.7568913233651675
Obs_GFP_Phall_Rhod_Nano2_488_7.czi_intensities.txt	52	13.0	0.6290682550528477	3.080952339676083
Obs_GFP_Phall_Rhod_Nano2_488_7.czi_intensities.txt	53	13.0	0.6972784429705621	2.9844934615947487
Obs_GFP_Phall_Rhod_Nano2_488_7.czi_intensities.txt	54	14.0	0.6717385940119178	2.768519547851485
Obs_GFP_Phall_Rhod_Nano2_488_7.czi_intensities.txt	55	14.0	0.6498372768316566	2.748160656721081
Obs_GFP_Phall_Rhod_Nano2_488_7.czi_intensities.txt	56	14.0	0.5859245997170336	2.9206860550867426
Obs_GFP_Phall_Rhod_Nano2_488_7.czi_intensities.txt	57	14.0	0.5610933438928833	2.840004312694698
Obs_GFP_Phall_Rhod_Nano2_488_7.czi_intensities.txt	58	15.0	0.5302044915982428	2.7437624897567967
Obs_GFP_Phall_Rhod_Nano2_488_7.czi_intensities.txt	59	15.0	0.55478886404813	2.8507166268484974
Obs_GFP_Phall_Rhod_Nano2_488_7.czi_intensities.txt	60	7.0	0.8517498455714128	3.7043164823055847
Obs_GFP_Phall_Rhod_Nano2_488_7.czi_intensities.txt	61	7.0	0.9700715041787238	3.5520541578696037
Obs_GFP_Phall_Rhod_Nano2_488_7.czi_intensities.txt	62	7.0	1.0463986757653738	3.6964334470699156
Obs_GFP_Phall_Rhod_Nano2_488_7.czi_intensities.txt	63	7.0	0.9020624335453298	3.5595416453213184
Obs_GFP_Phall_Rhod_Nano2_488_7.czi_intensities.txt	64	7.0	0.9753079109786867	3.5054892884757933
Obs_GFP_Phall_Rhod_Nano2_488_7.czi_intensities.txt	65	7.0	1.0201236171171264	3.692621958665398
Obs_GFP_Phall_Rhod_Nano2_488_9.czi_intensities.txt	1	2.0	1.424919229088636	3.9310174170804575
Obs_GFP_Phall_Rhod_Nano2_488_9.czi_intensities.txt	2	2.0	1.4489827554329744	4.3005450118811535
Obs_GFP_Phall_Rhod_Nano2_488_9.czi_intensities.txt	3	2.0	1.4208523000932376	4.398295526836813
Obs_GFP_Phall_Rhod_Nano2_488_9.czi_intensities.txt	4	2.0	1.400294755347892	4.612640012562353
Obs_GFP_Phall_Rhod_Nano2_488_9.czi_intensities.txt	5	2.0	1.4778296667730522	4.328856712886195
Obs_GFP_Phall_Rhod_Nano2_488_9.czi_intensities.txt	6	2.0	1.3543060469298247	4.22499707419428
Obs_GFP_Phall_Rhod_Nano2_488_9.czi_intensities.txt	7	2.0	1.3624119792963527	4.166952007317368
Obs_GFP_Phall_Rhod_Nano2_488_9.czi_intensities.txt	8	2.0	1.4141425537096735	4.348520196659493
Obs_GFP_Phall_Rhod_Nano2_488_9.czi_intensities.txt	9	2.0	1.3673857859196528	4.2188173332012315
Obs_GFP_Phall_Rhod_Nano2_488_9.czi_intensities.txt	10	2.0	1.4241465241295244	4.196434434834952
Obs_GFP_Phall_Rhod_Nano2_488_9.czi_intensities.txt	11	2.0	1.3338796534354636	4.038013552708223
Obs_GFP_Phall_Rhod_Nano2_488_9.czi_intensities.txt	12	2.0	1.4383558057445687	4.753165613387215
Obs_GFP_Phall_Rhod_Nano2_488_9.czi_intensities.txt	13	2.0	1.48285570932729	4.749933301373072
Obs_GFP_Phall_Rhod_Nano2_488_9.czi_intensities.txt	14	3.0	1.1441168990857664	3.3631017970712986
Obs_GFP_Phall_Rhod_Nano2_488_9.czi_intensities.txt	15	3.0	1.2198015514177056	4.100988936956895
Obs_GFP_Phall_Rhod_Nano2_488_9.czi_intensities.txt	16	3.0	1.2691390552660324	4.264891529646521
Obs_GFP_Phall_Rhod_Nano2_488_9.czi_intensities.txt	17	3.0	1.117204904918433	3.956235945412606
Obs_GFP_Phall_Rhod_Nano2_488_9.czi_intensities.txt	18	3.0	1.1630728118379858	3.9791386500740247
Obs_GFP_Phall_Rhod_Nano2_488_9.czi_intensities.txt	19	3.0	1.2950378458504888	4.176696197969222
Obs_GFP_Phall_Rhod_Nano2_488_9.czi_intensities.txt	20	4.0	0.9648739396091874	3.656508673841694
Obs_GFP_Phall_Rhod_Nano2_488_9.czi_intensities.txt	21	4.0	1.1652615738043526	4.266365624738978
Obs_GFP_Phall_Rhod_Nano2_488_9.czi_intensities.txt	22	4.0	1.2917883863266664	4.611079513419101
Obs_GFP_Phall_Rhod_Nano2_488_9.czi_intensities.txt	23	5.0	0.9346725502214608	3.871910219622098
Obs_GFP_Phall_Rhod_Nano2_488_9.czi_intensities.txt	24	5.0	0.9114603639243247	3.501249897839855
Obs_GFP_Phall_Rhod_Nano2_488_9.czi_intensities.txt	25	5.0	0.9767675626524052	3.492657195062849
Obs_GFP_Phall_Rhod_Nano2_488_9.czi_intensities.txt	26	5.0	1.0207671244197576	3.5761485802382573
Obs_GFP_Phall_Rhod_Nano2_488_9.czi_intensities.txt	27	5.0	1.0502690130194388	3.7292236583396305
Obs_GFP_Phall_Rhod_Nano2_488_9.czi_intensities.txt	28	5.0	0.9774754852299736	3.563304827485973
Obs_GFP_Phall_Rhod_Nano2_488_9.czi_intensities.txt	29	5.0	0.9390611708577165	3.921258241827138
Obs_GFP_Phall_Rhod_Nano2_488_9.czi_intensities.txt	30	5.0	0.8873184407031574	4.183814011813251
Obs_GFP_Phall_Rhod_Nano2_488_9.czi_intensities.txt	31	6.0	0.9470140879522239	3.2958836043479844
Obs_GFP_Phall_Rhod_Nano2_488_9.czi_intensities.txt	32	6.0	0.7651643051806444	3.4243838023597553
Obs_GFP_Phall_Rhod_Nano2_488_9.czi_intensities.txt	33	6.0	0.9046684702514075	3.5136118148825215
Obs_GFP_Phall_Rhod_Nano2_488_9.czi_intensities.txt	34	6.0	0.8622056886578108	3.344748226201695
Obs_GFP_Phall_Rhod_Nano2_488_9.czi_intensities.txt	35	6.0	0.7837283246208692	3.3671572131436407
Obs_GFP_Phall_Rhod_Nano2_488_9.czi_intensities.txt	36	7.0	0.8219515679492734	3.5507902901678214
Obs_GFP_Phall_Rhod_Nano2_488_9.czi_intensities.txt	37	7.0	0.871769493096913	3.6637205840391505
Obs_GFP_Phall_Rhod_Nano2_488_9.czi_intensities.txt	38	8.0	0.8093197388795108	2.916611485183828
