# Supplementary material for: A nanobody toolbox to investigate localisation and dynamics of Drosophila titins and other key sarcomeric proteins
Source: eLife. 2023 Jan 16;12:e79343. doi: 10.7554/eLife.79343 (PMC9886281; doi:10.7554/eLife.79343)
Supplement: Figure 8—source data 1. [file elife-79343-fig8-data1.xlsx]

## Sheet: Figure 8A
	genotype: w[1118] stained with Nano2 and Nano42
	experiment	larvae number	Sls length [µm]	sarcomere length [µm]
	1	1	2.68476	8.65685
		2	2.39652	8.9052
		3	2.30882	8.41235
		4	2.39428	8.19375
		5	2.73267	8.9084
		5b	2.48222	9.11275
		6	2.06568	8.10335
	2	2	2.19782	7.9321
		3	2.43898	8.20885
		4	2.42606	8.33755
		5	2.51258	8.3066
