# Supplementary material for: A nanobody toolbox to investigate localisation and dynamics of Drosophila titins and other key sarcomeric proteins
Source: eLife. 2023 Jan 16;12:e79343. doi: 10.7554/eLife.79343 (PMC9886281; doi:10.7554/eLife.79343)
Supplement: Figure 9—source data 1. [file elife-79343-fig9-data1.xlsx]

## Sheet: Fig. 9B,C - FRAP
	BEFORE FRAP						AFTER FRAP
	frame	larva #1	larva #2	larva #3	larva #4		time (min)	larva #1	larva #2	larva #3	larva #4
	0	0.986003	0.984766	1.07056	0.977674		0	0.194405	0.0810523	0.074	0.0990175
	1	0.983473	0.990495	1.07845	1.00295		1	0.0328751	0.120892	0.0895681	0.123251
	2	0.973584	0.98894	0.942999	1.00391		2	0.0382387	0.120018	0.10857	0.122471
	3	0.968539	0.999204	0.855366	0.989094		3	0.0352712	0.134884	0.0990266	0.125529
	4	0.951713	0.970408	0.867591	0.999144		4	0.0357495	0.139372	0.0953118	0.121943
							5	0.0148653	0.149778	0.0923804	0.122568
							6	0.0405627	0.142402	0.101642	0.110686
							7	0.0187472	0.134484	0.0959732	0.0998022
							8	0.00890822	0.114378	0.104939	0.114237
							9	0.00056415	0.134015	0.0969022	0.115569
							10	0.0397702	0.143237	0.0946814	0.113585
							11	0.0242754	0.166045	0.0987112	0.129261
							12	0.0376783	0.181094	0.107024	0.207699
							13	0.0321836	0.18976	0.10675	0.203958
							14	0.0540639	0.142669	0.109327	0.203918
							15	0.0600756	0.120584	0.120373	0.204333
							16	0.0570208	0.121012	0.120586	0.181697
							17	0.049124	0.13758	0.125753	0.163889
							18	0.0608854	0.151894	0.118844	0.15986
							19	0.0796228	0.0665117	0.125899	0.147084
							20	0.077221	0.0914447	0.179067	0.141062
							21	0.0808177	0.0906686	0.192531	0.244212
							22	0.0952677	0.100726	0.202865	0.236451
							23	0.0881103	0.0901997	0.203785	0.226292
							24	0.09799	0.0781477	0.198978	0.222669
							25	0.104805	0.0742576	0.246847	0.211863
							26	0.106655	0.0799244	0.275093	0.226428
							27	0.127419	0.0774271	0.282466	0.213366
							28	0.128778	0.0723493	0.288855	0.213936
							29	0.128235	0.0690345	0.285134	0.232787

## Sheet: Fig. 9S1B Nano2NeonGreen length
	Genotype: Mef2-GAL4					Genotype: Mef2-GAL4; UAS-Nano2 NeonGreen
	file	Larvae #	Sarcomere length [µm]	Sls length [µm]		file	Larvae #	Sarcomere length [µm]	Sls length [µm]
	220921	40x_z4_L3__w-_Nano2_405_Nano42_647_Phallo_1	7.44645	1.99265		220921	40x_z4_L3_Mef2Gal4_Nano2_NG_x_w-_Nano2_405_Nano42_647_Phallo_1	8.07434	2.6292
		40x_z4_L3__w-_Nano2_405_Nano42_647_Phallo_2	8.15997	2.43891			40x_z4_L3_Mef2Gal4_Nano2_NG_x_w-_Nano2_405_Nano42_647_Phallo_2	7.91348	2.40776
		40x_z4_L3__w-_Nano2_405_Nano42_647_Phallo_3	6.04537	2.35458			40x_z4_L3_Mef2Gal4_Nano2_NG_x_w-_Nano2_405_Nano42_647_Phallo_3	9.63453	3.02919
		40x_z4_L3__w-_Nano2_405_Nano42_647_Phallo_4	8.22482	2.43243			40x_z4_L3_Mef2Gal4_Nano2_NG_x_w-_Nano2_405_Nano42_647_Phallo_4	8.1859	2.49082
		40x_z4_L3__w-_Nano2_405_Nano42_647_Phallo_5	9.02915	2.46486			40x_z4_L3_Mef2Gal4_Nano2_NG_x_w-_Nano2_405_Nano42_647_Phallo_5	7.97832	2.43891
	221013	40x_z4_Mef2_w-_Nano2_405_Nano39_647_Phallo_1	10.5858	3.23457		221013	40x_z4_Mef2_UAS_nano2NG_Nano2_405_Nano39_647_Phallo_1	8.40645	2.40432
		40x_z4_Mef2_w-_Nano2_405_Nano39_647_Phallo_2	8.51023	2.67891			40x_z4_Mef2_UAS_nano2NG_Nano2_405_Nano39_647_Phallo_2	8.7524	2.23135
		40x_z4_Mef2_w-_Nano2_405_Nano39_647_Phallo_3	7.9135	2.2227			40x_z4_Mef2_UAS_nano2NG_Nano2_405_Nano39_647_Phallo_3	9.58267	2.73079
		40x_z4_Mef2_w-_Nano2_405_Nano39_647_Phallo_4	9.63887	3.00322			40x_z4_Mef2_UAS_nano2NG_Nano2_405_Nano39_647_Phallo_4	10.7934	3.51135
		40x_z4_Mef2_w-_Nano2_405_Nano39_647_Phallo_5	8.19887	2.46486			40x_z4_Mef2_UAS_nano2NG_Nano2_405_Nano39_647_Phallo_5	7.16103	2.84538

## Sheet: Fig. 9S1C Nano2NeonG locomotion
	Locomotion - velocity [mm/sec]				Body bending [degrees]
	Larvae #	Mef2-GAL4;	Mef2-GAL4; UAS-Nano2-NeonGreen		Larvae #	Mef2-GAL4;	Mef2-GAL4; UAS-Nano2-NeonGreen
	0	0.756548	0.70482		0	183.239	181.266
	1	1.05605	1.15391		1	184.109	171.063
	2	2.01663	1.08097		2	194.667	168.195
	3	0.723396	2.34044		3	167.269	183.819
	4	0.855039	1.06613		4	157.087	182.103
	5	1.95921	1.81349		5	178.893	175.695
	6	0.623413	2.59305		6	189.734	188.983
	7	1.24878	3.13845		7	182.527	180.47
	8	1.49161	0.595911		8	184.075	123.81
	9	1.50407	1.0271		9	181.19	166.176
	10	1.47631	1.86213		10	177.968	167.602
	11	1.34663	1.66053		11	161.918	174.667
	12	2.11251	1.68351		12	175.899	180.387
	13	0.805381	2.45078		13	181.02	179.134
	14	1.29267	1.83348		14	171.762	186.014
	15	0.85474	1.82848		15	168.828	194.76
	16	2.73275	1.53734		16	182.665	173.021
	17		1.3421		17		190.251
	18		1.09424		18		176.322
