# Supplementary material for: A nanobody toolbox to investigate localisation and dynamics of Drosophila titins and other key sarcomeric proteins
Source: eLife. 2023 Jan 16;12:e79343. doi: 10.7554/eLife.79343 (PMC9886281; doi:10.7554/eLife.79343)
Supplement: Figure 10—source data 1. [file elife-79343-fig10-data1.xlsx]

## Sheet: Fig. 10A,B Nano2 deGrad
	Genotype: Mef2-GAL4;						Genotype: Mef2-GAL4; UAS Sls-Nano2-deGrad
	file	larvae #	relative intensity Nano2	relative intensity Kettin	relative intensity Nano39		file	larvae #	relative intensity Nano2	relative intensity Kettin	relative intensity Nano39
	221011	1	0.936441		1.20067		221011	1	0.133951		1.44526
		2	1.20073		1.41955			2	0.107557		1.38514
		3	1.11569		0.73356			3	0.262089		1.88907
		4	1.06875		0.73356			4	0.255489		1.8911
		5	0.678379		0.912659			5	0.269375		1.45454
	221013	1	0.919686	2.04671	0.988796		221013	1	0.170069	0.492796	0.67958
		2	1.08879	0.732231	0.997081			2	0.358079	0.675332	1.06481
		3	0.671688	0.669719	0.527069			3	0.188103	0.473625	0.947944
		4	1.18238	0.551344	1.05603			4	0.297032	0.156511	0.729301
		5	1.13746		1.43102			5	0.243538	0.0629464	0.718609
	221014	0	0.799266	0.783929	1.16518			6	0.11813	0.867407	0.608723
		1	0.578911	0.624678	0.882251		221014	3	0.343707	0.417348	1.43431
		2	0.416415	1.187	0.838609			4	0.304958	0.327164	2.43469
		4	1.37088	1.36152	1.28727			5	0.24275	0.552087	1.66011
		5	1.41727	1.02144	0.913346
		6	1.41727	1.02144	0.913346

## Sheet: Fig. 10C Nano-deGrad lethality
	cross	Mef2-GAL4 x UAS_Nano2_Degrad/TM3, Sb			cross	Mef2-GAL4 x UAS_Nano42_Degrad/TM3, Sb
	day	Mef2-GAL4 / UAS_Nano2_Degrad	Mef2-GAL4 / TM3, Sb		day	Mef2-GAL4 / UAS_Nano42_Degrad	Mef2-GAL4 / TM3, Sb
	D1	0	8		D1	5	22
	D2	0	36		D2	4	7
	D3	0	22		D3	3	33
	D4	0	19		D4	0	4
	total	0	85		total	12	66
	%	0	100		%	15.3846	84.6154

## Sheet: Fig. 10D,E Nano42 deGrad
	Genotype: Mef2-GAL4;							Genotype: Mef2GAL4; UAS Sls-Nano42-deGrad
	file	larvae #	relative intensity Nano2	relative intensity Nano39	relative intensity Nano42			file	larvae #	relative intensity Nano2	relative intensity Nano39	relative intensity Nano42
	221006	1	0.729388		0.520832			221006	1	1.4203		0.268525
		1b	0.985674		1.20143				1b	1.65927		0.240573
		2	0.941309		0.905939			221018	1	0.932264	0.455472
		3	1.34363		1.3718				2	1.39634	1.32543
	221018	1	0.519705	0.818308					3	1.52948	0.498575
		2	1.38563	1.68811					4	2.14948	1.12554
		3	0.909911	0.715859					5	1.15199	0.456521
		4	1.28726	0.762395				221025	1	0.849691	0.480584	0.0710152
		5	0.897497	1.01533					2	0.635746	0.4797	0.0814216
	221025	1	0.590689	0.558233	0.389268				3	0.616157	0.379399	0.0675205
		2	1.79109	1.5211	2.23332				4	0.742725	0.441445	0.142861
		3	0.920019	1.28115	0.958558				5	0.518915	0.465125	0.0301927
		4	0.698201	0.639513	0.418857				5	0.518915	0.465125	0.0301927
